# Supplementary material
Source: PubMed Central journal article supplement (PMC4701548)
Supplement: JCI84015.sd.pdf [file JCI84015.sd.pdf]

## SUPPLEMENTAL INFORMATION

### SUPPLEMENTAL EXPERIMENTAL PROCEDURES

#### Molecular Cloning and DNA Constructs

For minigene reporter, mouse tail genomic DNA was used as template. Oligos containing ApaI and BglII digestion sites were used to amplify Mef2a and Mef2d exon  $\alpha 2$  with the flanking introns. Oligos containing mutant and deletion RBFox1 binding site were used to generate mutant minigene reporters in PCR reaction. After amplification, the PCR products were purified through QIAquick Gel Extraction Kit (Qiagen) according to manufacturer's instruction. The purified PCR products were digested and ligated into linearized pDUP33 minigene vector. For RBFox1 overexpression construct, oligos containing KpnI and XhoI digestion sites were used to amplify muscle specific RBFox1. The digested PCR product was subsequently ligated into linearized pShuttle-CMV vector. Primers used for real-time PCR analysis and constructs cloning see [Table S3](#).

#### Mouse generation:

For RBFox1-transgenic mouse: The cardiac specific tetracycline-inducible mice overexpressing RBFox1 was generated using a mouse muscle specific RBFox1 cDNA inserted into the inducible  $\alpha$ -myosin heavy chain promoter expression vector. The RBFox1( C57BL/6 background) mice were crossed with tTA mice to produce wild-type, tTA, RBFox1 and RBFox1/tTA mice. The wildtype and single transgenic mice were used as control (non-TG) and RBFox1/tTA mice were used as RBFox1-TG. The Non-TG and RBFox1-TG mice were fed with food containing 0.625g/kg Doxycycline obtained from Harlan (Teklad Global Rodent Diet). Mice were switched to regular diet to induce RBFox1 expression for at least 2 weeks before cardiac function or TAC procedure was measured or operated. The RBFox1-cardiac specific knockout mouse (CKO): B6.129S2-<sup>Rbfox1tm1.1Dbk</sup>/J mouse line was purchased from The Jackson Laboratory(1). These mice were crossed with Nkx2.5-Cre mice to generate RBFox1-CKO mice(2). All animals in this study were handled in accordance with the *Guide for the Care and Use of Laboratory Animals published by the US National Institutes of Health*.

#### Histological Analysis:

**WGA Staining:** Cardiomyocytes surface area and myocyte cross-section area were quantified by staining cell surface border with Wheat germ Agglutinin (WGA). Cardiomyocytes and heart histology sections were fixed and blocked with 5%BSA/PBS at room temperature for 1hr before stained with WGA solution (Invitrogen W-11261) at room temperature for 1 hour. The cells were visualized under a Nikon fluorescent microscope and area of interest was quantified using NIS-Elements AR Analysis program.

**Masson-Trichrome Staining:** Heart histology slides were rehydrated and stained using Masson-Trichrome staining kit (Sigma-Aldrich HT-15) according to manufacture's protocol. Fibrosis was visualized under microscope under bright field.

#### Echocardiogram Analysis for Mouse Heart Function:

Mice were imaged non-invasively for heart function and morphology by echocardiography prior and follow TAC surgery on weekly basis. The mice were anesthetized and maintained with 2% isoflurane in 95% oxygen. A Vevo 2100 (Visual Sonics) echocardiography system with a 30MHz scanhead was used to acquire the data. A parasternal long axis and short axis view were recorded. The short axis view was used to generate M-mode images for analysis of ejection fraction and fraction shortening.

#### Protein synthesis analysis:

Protein synthesis rate was analyzed through puromycin incorporation assay. Cells are cultured under regular media and treated with PE alone or in combination with RBFox1 adenovirus. Cells were labeled with 1uM puromycin for 30 min at 37 degree before harvesting for Western Blot analysis. Western Blot

was performed using anti-puromycin antibody (Millipore MABE343) and puromycin signal is quantified by densitometry.

### **Myocardial Samples from non-failing and failing human hearts**

The failing heart samples (n=4) were obtained from the left ventricular (LV) anterior wall during heart transplantation or implantation of an LV assist device as described(3). The non-failing heart samples (NF) (n=4) were obtained from the LV free wall and procured from National Disease Research Interchange (NDRI) and University of Pennsylvania. NF heart donors had no history of macroscopic or laboratory signs of cardiac diseases. The tissue collection was approved by the UCLA Institutional Review Board #11-001053 and #12-000207.

### **Pressure-overload in mouse**

Left ventricle tissues were collected from male C57BL/6 mice at indicated time points post trans-aortic constriction (TAC) procedure (HF) and their corresponding Sham controls as described(4). Doppler velocity measurement of right and left carotid arteries were obtained from TAC treated mice to confirm the consistency of the surgery procedure. The heart failure status of the TAC treated animals was established based on a significant increase in heart weight and a significant reduction in ejection fractions measured by echocardiography.

In RBFox1-TG TAC surgery, both male and female were included in the study. In RBFox1-cKO TAC surgery and cardiac function analysis, both male and female were included in the study. The control mice for RBFox1-cKO include three different genotype: Nkx2.5-Cre (-)/ RBFox1<sup>(flox/flox)</sup>; Nkx2.5-Cre (+)/RBFox1<sup>(+/+)</sup> and Nkx2.5-Cre (-)/RBFox1<sup>(+/flox)</sup>

### **RNA-Seq**

A total of 5ug RNA per sample was processed via poly-A selection and fragmentation. The first-strand cDNA was generated using random primer based reverse transcription and subsequently used for generating second-strand cDNA using RNase H and DNA polymerase. Sequence adapters were ligated using the Illumina Paired-End sample prep kit. Fragments of ~200bp were isolated by gel electrophoresis, amplified by 15 cycles of PCR and sequenced on the Illumina Genome Analyzer II in the paired-end sequencing protocol as described(4).

### **Western Blot**

20ug of mouse heart protein was used for each sample and 10ug of cell lysates from neonatal rat ventricle cardiomyocytes was used for each sample. Western Blot was performed using NuPAGE SDS-PAGE Gel System (Invitrogen) according to the manufacturer's instruction. Anti-RBFox1 antibody was generated as described(5). Anti-RBFox2 antibody was purchased from Abcom (ab51361). Anti-HDAC2 antibody was purchased from Cell Signaling. Anti-Actin antibody was purchased from Santa Cruz Biotechnology (SC-1616). Antibody used for RNA Polymerase II ChIP-Seq is purchased from Abcam (ab5095).

### **Minigene Reporter for RNA Splicing**

The mouse Mef2a and Mef2d -Exon $\alpha$ 2 minigene reporter was constructed based on pDUP33 as template(6) which contains splicing donor exons and mouse Mef2a/d Exon  $\alpha$ 2 and its surrounding intron sequences obtained from mouse genomic DNA. The mutant Mef2a/d minigene reporters were subsequently generated by mutating the putative RBFox1 binding motif in the Mef2a/d intron sequence or deleting the RBFox1 binding motif as indicated in [Figure S5](#).

### **CLIP**

CLIP assay was performed using a kit according to manufacture's protocol with minor modification (Millipore 17-700). Briefly, C2C12 cells were mock infected or infected with DN-RBFox1 and RBFox1 adenovirus. 48hr post infection, cells were UV cross-linked and followed by immune-precipitation with RBFox1 or IgG antibody. After immune-precipitation, protein was digested using proteinase K and

cDNA library was generated from the cross-linked RNA. Different primers targeting Mef2a, Mef2c, Mef2d intron region with or without RBFOX1 binding motif were used for RT-PCR analysis as described(7).

### **Zebrafish Injection**

Wild-type zebrafish embryo was injected at one-two cell stage with either morpholino (GENE TOOLS, LLC) or mRNA at indicated concentration/amount. Standard control morpholino is purchased from GENE TOOLS (**CCTCTTACCTCAGTTACAATTTATA**). Zebrafish phenotype was analyzed at 48hpf under stereo microscope as previously described(8).

### **RasI-SEQ**

RasI-seq was performed according to previously described(9). Briefly, RasI-seq was performed to profile large number of mRNA isoforms using pooled pairs of oligonucleotides each flanked by a universal primer to target specific splice junctions in the spliced mRNAs. The current RasI-seq protocol is designed to detect a total of 3885 alternative splicing events in mouse genome. Total RNA from 25 mouse hearts including control, RBFOX1-TG and RBFOX1-CKO mice under baseline and post-pressure overload induced stress was isolated and subject to rasI-seq analysis. Differentially expressed exons were identified from normalized reads and analyzed by clustering or comparison for overlapping exons among different groups.

### **Real-time PCR**

1ug RNA was used for first-strand cDNA synthesis using Random Primer (Invitrogen) and SuperScriptII Reverse Transcriptase (Invitrogen) according to manufacturer's instruction. Real-time PCR was performed using IQ SYBR Green Supermix (Bio-Rad) with CFX-96 Real-time PCR Detection System (Bio-Rad).

### **Cell Culture**

Neonatal rat ventricular myocytes (NRVM) were prepared from 2 day old Sprague Dawley rat by enzymatic digestion with collagenase (Worthington) and pancreatin (Sigma) in 1xADS buffer at 37°C as described previously(10). NRVM were cultured in serum-free DMEM supplemented with 100U/mL Pen/Strep (Invitrogen) and 5% ITS (w/v) (BD Biosciences). HEK293 cells (ATCC: CRL-1573) and C2C12 cells (ATCC: CRL-1772) were cultured in DMEM with 10% fetal bovine serum and 5% Pen/Strep (Invitrogen). Lipofectamine 2000 (Invitrogen) was used to transfect DNA and siRNA according to manufacturer's recommendations as previously described(10).

### **Statistical Analysis**

Data are expressed as mean  $\pm$  STDEV. For comparison between two groups, differences were analyzed by Student's t-test. For multiple groups' comparison, differences were analyzed by one-way ANOVA. p values  $\leq 0.05$  were considered as significant.

### References Cited in Supplemental Methods:

1. Gehman LT, Stoilov P, Maguire J, Damianov A, Lin CH, Shiue L, Ares M, Jr., Mody I, and Black DL. The splicing regulator Rbfox1 (A2BP1) controls neuronal excitation in the mammalian brain. *Nat Genet.* 2011;43(7):706-11.
2. Harmon AW, and Nakano A. Nkx2-5 lineage tracing visualizes the distribution of second heart field-derived aortic smooth muscle. *Genesis.* 2013;51(12):862-9.
3. Ahuja P, Wanagat J, Wang Z, Wang Y, Liem DA, Ping P, Antoshechkin IA, Margulies KB, and Maclellan WR. Divergent mitochondrial biogenesis responses in human cardiomyopathy. *Circulation.* 2013;127(19):1957-67.
4. Lee JH, Gao C, Peng G, Greer C, Ren S, Wang Y, and Xiao X. Analysis of transcriptome complexity through RNA sequencing in normal and failing murine hearts. *Circ Res.* 2011;109(12):1332-41.
5. Tang ZZ, Zheng S, Nikolic J, and Black DL. Developmental control of CaV1.2 L-type calcium channel splicing by Fox proteins. *Mol Cell Biol.* 2009;29(17):4757-65.
6. Lee JA, Tang ZZ, and Black DL. An inducible change in Fox-1/A2BP1 splicing modulates the alternative splicing of downstream neuronal target exons. *Genes Dev.* 2009;23(19):2284-93.
7. Ule J, Jensen K, Mele A, and Darnell RB. CLIP: a method for identifying protein-RNA interaction sites in living cells. *Methods.* 2005;37(4):376-86.
8. Lu G, Sun H, She P, Youn JY, Warburton S, Ping P, Vondriska TM, Cai H, Lynch CJ, and Wang Y. Protein phosphatase 2Cm is a critical regulator of branched-chain amino acid catabolism in mice and cultured cells. *J Clin Invest.* 2009;119(6):1678-87.
9. Li H, Qiu J, and Fu XD. RASL-seq for massively parallel and quantitative analysis of gene expression. *Curr Protoc Mol Biol.* 2012;Chapter 4(Unit 4 13 1-9.
10. Ota A, Zhang J, Ping P, Han J, and Wang Y. Specific regulation of noncanonical p38alpha activation by Hsp90-Cdc37 chaperone complex in cardiomyocyte. *Circ Res.* 2010;106(8):1404-12.

# Supplement Table 1

## Alternative Splicing Events Candidate Genes

| Gene ID | Exon                                | Splicing Event in Failing Heart |
|---------|-------------------------------------|---------------------------------|
| Map3k7  | chr4:32081849:+_chr4:32081929:+     | Exon Skipping                   |
| Ccne1   | chr7:38884266:-_chr7:38884377:-     | Exon Skipping                   |
| Bach2   | chr4:32504410:+_chr4:32504558:+     | Exon Skipping                   |
| Lyst    | chr13:13773559:+_chr13:13773789:+   | Exon Skipping                   |
| Ptprd   | chr4:75781449:-_chr4:75781460:-     | Exon Skipping                   |
| Cmya5   | chr13:93854500:-_chr13:93854595:-   | Exon Skipping                   |
| Slc7a1  | chr5:149159729:-_chr5:149159887:-   | Exon Inclusion                  |
| Ppp3cb  | chr14:21322469:-_chr14:21322498:-   | Exon Inclusion                  |
| Palm2   | chr4:57899161:+_chr4:57899199:+     | Exon Skipping                   |
| Pdlim5  | chr3:141969248:-_chr3:141969262:-   | Exon Skipping                   |
| SImap   | chr14:27284687:-_chr14:27284758:-   | Exon Skipping                   |
| Synpo2l | chr14:21484966:-_chr14:21485480:-   | Exon Skipping                   |
| Cugbp2  | chr2:6470878:-_chr2:6471021:-       | Exon Skipping                   |
| Rbpms   | chr8:34899864:-_chr8:34899967:-     | Exon Skipping                   |
| Prpf39  | chr12:66156421:+_chr12:66156520:+   | Exon Inclusion                  |
| Map2k7  | chr8:4240688:+_chr8:4240735:+       | Exon Skipping                   |
| Map3k3  | chr11:105985100:+_chr11:105985220:+ | Exon Skipping                   |
| Mbnl2   | chr14:120803860:+_chr14:120803954:+ | Exon Inclusion                  |
| Mff     | chr1:82738393:+_chr1:82738551:+     | Exon Skipping                   |
| Slc27a1 | chr8:74093241:+_chr8:74093347:+     | Exon Skipping                   |
| Camk2d  | chr3:126505855:+_chr3:126505887:+   | Exon Inclusion                  |
| Camk2g  | chr14:21565014:-_chr14:21565082:-   | Exon Inclusion                  |
| Mef2a   | chr7:74412953:-_chr7:74413090:-     | Mutually Exclusive              |
| Mef2d   | chr3:87962143:+_chr3:87962277:+     | Mutually Exclusive              |
| Mtus1   | chr8:42135339:-_chr8:42135470:-     | Exon Skipping                   |
| Smtn    | chr11:3420755:-_chr11:3420919:-     | Exon Skipping                   |
| Myo7a   | chr7:105221630:-_chr7:105221756:-   | Exon Skipping                   |
| Deaf1   | chr7:148510341:-_chr7:148510515:-   | Exon Skipping                   |
| Mef2a   | chr7:74413155:-_chr7:74413286:-     | Mutually Exclusive              |
| Mef2d   | chr3:87961956:+_chr3:87962093:+     | Mutually Exclusive              |
| Mef2c   | chr13:83764965:+_chr13:83765102:+   | Mutually Exclusive              |
| Mef2c   | chr13:83764760:+_chr13:837649032:+  | Mutually Exclusive              |

**Supplemental Table 1. List of alternatively spliced candidate genes in pressure-overload induced mouse failing heart**

Supplemental Table 2

Sham

| Position | Kmer  | Conservation | Enrichment | Known?   |
|----------|-------|--------------|------------|----------|
| Upln 1st |       |              |            |          |
|          | CGGCG | 7.21E-005    | 6.14E-004  |          |
|          | GCGGC | 1.90E-003    | 2.31E-002  |          |
|          | CCGCC | 2.74E-003    | 1.34E-002  |          |
| Upln 2nd |       |              |            |          |
|          | TTTTT | 1.23E-004    | 8.78E-014  | FESS;TIA |
|          | TGATA | 2.30E-003    | 8.59E-003  |          |
|          | CACGT | 6.01E-003    | 1.09E-002  |          |
| Exon     |       |              |            |          |
|          | TACCA | 1.75E-005    | 2.07E-004  |          |
|          | TGTGT | 3.32E-004    | 8.79E-003  | CELF;    |
|          | AAGGA | 6.39E-004    | 6.46E-004  | RESE;    |
| Dnln 1st |       |              |            |          |
|          | TGCAT | 3.26E-008    | 3.33E-005  | RBFox;   |
|          | GCATG | 1.32E-007    | 1.36E-006  | RBFox;   |
|          | CTGCT | 1.48E-004    | 1.94E-002  |          |
| Dnln 2nd |       |              |            |          |
|          | ACATA | 5.60E-004    | 9.89E-004  |          |
|          | TGTGT | 7.49E-004    | 3.93E-005  | CELF;    |
|          | CGCGG | 7.68E-004    | 6.12E-003  |          |

Heart Failure

| Position | Kmer  | Conservation | Enrichment | Known? |
|----------|-------|--------------|------------|--------|
| Upln 1st |       |              |            |        |
|          | CACAC | 9.25E-004    | 7.74E-005  | hnRNPL |
|          | CGTGG | 5.89E-003    | 1.25E-003  |        |
|          | GAGCA | 8.03E-003    | 1.14E-002  |        |
| Upln 2nd |       |              |            |        |
|          | CTAAC | 2.62E-004    | 9.62E-003  | ASF;   |
|          | ACGCA | 2.27E-003    | 3.00E-002  | RESE;  |
|          | TATTT | 2.84E-003    | 5.03E-003  |        |
| Exon     |       |              |            |        |
|          | AAGGA | 8.95E-007    | 6.94E-004  | RESE;  |
|          | AGAAG | 9.22E-007    | 1.26E-004  | RESE;  |
|          | CTGGA | 4.10E-006    | 7.57E-005  | RESE;  |
| Dnln 1st |       |              |            |        |
|          | CGCAC | 2.67E-006    | 7.85E-004  |        |
|          | GCGCA | 5.02E-005    | 9.42E-003  |        |
|          | CAGAA | 5.39E-004    | 1.08E-003  | RESE;  |
| Dnln 2nd |       |              |            |        |
|          | GCATG | 5.48E-005    | 1.70E-002  | RBFox; |
|          | AAACA | 5.01E-004    | 6.81E-006  | RESE;  |
|          | TTTAA | 4.91E-003    | 9.38E-003  |        |

**Supplemental Table 2:Enrichment of RNA splicing factor binding motifs for alternatively spliced exons in cardiac transcriptome**

Summary of enriched binding motifs among exons differentially included in normal or failing heart transcriptome identified through RNA-seq [4](#). Using *de novo* motif discovery, 5-mers that are both evolutionarily conserved and highly enriched among the exons in the flanking introns and exonic regions. Five regions for each exon are analyzed and annotated: upstream intron first 250 nt (Upln 1st), upstream intron last 250nt (Upln 2nd), downstream intron first 250nt (Dnln 1st), downstream intron last 250nt (Dnln 2nd). RBFox binding motifs are highlighted in red.

**Supplemental Table 3: List of RT-PCR primers.**

| Primer           | Sequence 5'-3'          |
|------------------|-------------------------|
| Pabpc4 RT-F      | GGCTGTGGCTCCATACAAGT    |
| Pabpc4 RT-R      | TTGCAACTTGGTTCCTGGTG    |
| Prpf39 RT-F      | CGAAATTGAAAATGGGACTCA   |
| Prpf39 RT-R      | ATGCCTCACTCCTTCAATGC    |
| Prpf40b RT-F     | GTCAGAGACCACCAGCCATT    |
| Prpf40b RT-R     | CTCCCACACGGATTGCTTAT    |
| Ptb1 RT-F        | TCCAAGCTCACCAGTCTCAA    |
| Ptb1 RT-R        | AAGGCTCCATGGACATTAGG    |
| Rbm4 RT-F        | GCCTCGACAACACAGAGTTT    |
| Rbm4 RT-R        | GCACCACGAAGGGTGTATTC    |
| Rbm4b RT-F       | GCCAAGTTTGAGGAGTACGG    |
| Rbm4b RT-R       | GAGGGTTCAGTCCGCAATTA    |
| Rbm45 RT-F       | CACGAGTCAGCAGCAGTTTC    |
| Rbm45 RT-R       | AATCTTCCCGTGCAGAGTTG    |
| Rbpms RT-F       | GCAGTTCTGCTGAGGCTGT     |
| Rbpms RT-R       | CGATCTTGGCTTTACTGTTGC   |
| Rnps1 RT-F       | CACCTCTCCAAAGGCTATGC    |
| Rnps1 RT-R       | AGAGCGAGACCTCCTACGC     |
| Rrp1 RT-F        | AGAGCTGCTAACCACCGAGA    |
| Rrp1 RT-R        | GCTTCACCCTCTCCACTCTG    |
| Sfl RT-F         | CAGCACAACCCAAATGGAC     |
| Sfl RT-R         | CATGGAGGAAGAGGACCAGA    |
| SC-35 Exp RT-F   | GAGTCATTCTGCTGACAGC     |
| SC-35 Exp RT-R   | ATCATCAGCTAGATGTGCTC    |
| HnrnpA1 Exp RT-F | TGGAAGCAA TTTTGGAGGTGG  |
| HnrnpA1 Exp RT-R | GGTTCCGTGGTTTAGCAAAGT   |
| HnrnpA2 Exp RT-F | AAGAAATGCAGGAAGTCCAAAGT |
| HnrnpA2 Exp RT-R | CTC CTCCATAACCAGGGCTAC  |
| PTB Exp RT-F     | AGCAGAGACTACAC TCGACCT  |
| PTB Exp RT-R     | GTCCTGCATACGGAGAGG      |
| 9G8 Exp RT-F     | ATCGCTATAGCCGACGAAGA    |
| 9G8 Exp RT-R     | CGAGGAGATGCTGATCTTGA    |
| ASF Exp RT-F     | CACTGGTGTGCTGGAGTTTG    |
| ASF Exp RT-R     | GGCTTCTGCTACGACTACGG    |
| CELF4 Exp RT-F   | CAGCCCCCTTCACATAGAAA    |
| CELF4 Exp RT-R   | AGTGCACTCCTCGATGTTCC    |
| Fox1 Exp RT-F    | GTGGTTATGCTGCGTACCG     |
| Fox1 Exp RT-R    | GGAGCAAGTGTGTGGTGGTA    |
| Fox2 Exp RT-F    | AACCAGGAGCCAACAACAAC    |

|                 |                       |
|-----------------|-----------------------|
| Fox2 Exp RT-R   | ACTCCCGTAGAGGGTCAGGT  |
| HnrnpC Exp RT-F | CCTCCTCCTCCTCCTATTGC  |
| HnrnpC Exp RT-R | TTGGAAGAAGATCCCCTTTG  |
| HnrnpI Exp RT-F | AAGAGGCAGGCACTGGTAGA  |
| HnrnpI Exp RT-R | CTCCGGGAGTCATCAGAGTC  |
| MBNL1 Exp RT-F  | CGTGCCAATGTTTTTCAGTTG |
| MBNL1 Exp RT-R  | GGCAAGATCTCTGCTGGAAC  |
| Nova1 Exp RT-F  | TGAGAGGGTTTGCTTGATCC  |
| Nova1 Exp RT-R  | CGATCAGGATTAACGGTGGT  |
| Sam68 Exp RT-F  | TTTGTGGGGGAAGATTCTTGG |
| Sam68 Exp RT-R  | GGGGGTCCAAAGACTTCAAT  |
| SfI Exp RT-F    | CCCTAACCCCTGAGGACAGGT |
| SfI Exp RT-R    | GGGTTGAGAGCAACCATCTC  |
| SRp20 Exp RT-F  | TGGAAGTGTGCAATGGTGAA  |
| SRp20 Exp RT-R1 | GACGCTGAAAGGGCTAGTTG  |
| Tia1 Exp RT-F   | TTTGTGGAGTTCCATGAGCA  |
| Tia1 Exp RT-R   | GGTTGTTGCCCAATTCACTT  |
| TIAL1 Exp RT-F  | GTTGGGGATTGAGTCCAGA   |
| TIAL1 Exp RT-R  | GGACTTTCCAGTTGCCATGT  |
| TRA2A Exp RT-F  | GCAGAAGGCATACTGGAAGC  |
| TRA2A Exp RT-R  | AAAAGCAAATCCACGTGACC  |
| TRA2B Exp RT-F  | TACTCGAAGGCGTCATGTTG  |
| TRA2B Exp RT-R  | TAGCTTCCTTGGCAT       |
| CUGBP1 Exp RT-F | GTTCCAAGGACCTGGTCTGA  |
| CUGBP1 Exp RT-R | CCAGGGAGGACCTTCATGTT  |
| CUGBP2 Exp RT-F | GCCTCAAGTGCAGCTTTTCT  |
| Cugbp1 RT-F     | GCAGCTCAGAACACACCAAG  |
| Cugbp1 RT-R     | TTCCATGGTACTCCCAGTGC  |
| Cugbp2 RT-F     | ACCCAGGCCTACTCAGGAAT  |
| Cugbp2 RT-R     | AGGTTTGCTGTCGTTTTTGG  |
| Camk2g E RT-F   | AGTTCCAGCGTGCACCTAAT  |
| Camk2g E RT-R   | TTGTTGATGGCTTCGATCAG  |
| Cmya5 E RT-F    | AAATGGACAAGGCACTGGAC  |
| Cmya5 E RT-R    | CTCATCATACTGCGCCAAAA  |
| Map2k7 E RT-F   | CTTGATATCAGCCCACAGC   |
| Map2k7 E RT-R   | CGGTGTGAACAAGTTGATG   |
| Map3k3 E RT-F   | CTCCATCCTGTTGAAAAACCA |
| Map3k3 E RT-R   | GTGCTGTTGTCGCTCAGGTA  |
| Mef2a E RT-F    | GAGCCTCATGAAAGCAGGAC  |
| Mef2a E RT-R    | CGAGTGAACTCCCTGGGTTA  |
| Mff E RT-F      | GCAGTTGGCAGGCTAAAAAG  |

|                |                                                               |
|----------------|---------------------------------------------------------------|
| Mff E RT-R     | CTGACGTTGTCATGATGAGGAT                                        |
| Slc25a5 E RT-F | ACCCGTCTAGCAGCTGATGT                                          |
| Slc25a5 E RT-R | AAAAGCCTTGCTCCCTTCAT                                          |
| A2bp1 cDNA F1  | CTCAGGCCTCCACTAGTGATGAATTGTGAAAGAG<br>AGCAGCT                 |
| A2bp1 cDNA F2  | CTCAGGCCTCCACTAGTCATGTTGGCGTCGCAAGG<br>AGTCC                  |
| A2bp1 cDNA R   | CTCAGGCCTCCTCTAGAGATATGGAGCAAAACGG<br>TTGTATCC                |
| zA2bp1 nu RT-F | ACAGTGACAGTTACGGACGAGTTT                                      |
| zA2bp1 cy RT-F | TGAAATTTCTTGTTTACGGACGAGT                                     |
| zA2bp1 RT-R    | TAATATGGCGCGAAACGACT                                          |
| zA2bp1l RT-F   | ATCCAGCCACATATCGAGTG                                          |
| zA2bp1l RT-R   | ACTGGCCATTGTTCCAACCTC                                         |
| muA2bp1 F Flag | TAATCTCGAGATGGACTACAAGGACGACGATGAC<br>AAGTTGGCGTCGCAAGGAGTCCT |
| Fox-1 Neu F    | GTTTACCAGGATGGATTTTATGGTG                                     |
| Fox-1 53R      | GGTGTTACAAGAAATTCATCTGTTG                                     |
| Fox-1 76R      | AAACTCGTCCGTAAGTGTCACTGTAGGCAG                                |
| Fox-1 Mus F    | AAGAGCCAGTGTATGGCAATAAA                                       |

Supplemental Table 4

| Ensembl Gene ID     | Gene Symbol | foldChange  | pval      |
|---------------------|-------------|-------------|-----------|
| ENSRNOG000000013973 | Lcn2        | 171.4865558 | 0         |
| ENSRNOG000000017414 | IRF7        | 53.1643994  | 1.67E-304 |
| ENSRNOG000000031743 | GBP2        | 38.52187197 | 1.27E-259 |
| ENSRNOG000000032240 | gbp5        | 62.02930695 | 9.18E-245 |
| ENSRNOG000000037198 | usp18       | 64.91098284 | 3.95E-240 |
| ENSRNOG000000022839 | Ifit3       | 48.10842372 | 3.27E-233 |
| ENSRNOG000000026415 | col14a1     | 0.067074976 | 5.37E-229 |
| ENSRNOG000000022637 | NULL        | 12.21657861 | 1.50E-216 |
| ENSRNOG000000001963 | MX2         | 113.8352924 | 1.17E-212 |
| ENSRNOG000000011971 | C1s         | 24.12130876 | 2.41E-205 |
| ENSRNOG000000001187 | OASL        | 35.64755332 | 1.55E-190 |
| ENSRNOG000000006151 | Reg3b       | 14.20878678 | 5.39E-181 |
| ENSRNOG000000014786 | CCNE1       | 14.76338029 | 2.67E-177 |
| ENSRNOG000000000419 | CFB         | 21.20260821 | 3.34E-168 |
| ENSRNOG000000000239 | CCL7        | 90.64799258 | 1.68E-161 |
| ENSRNOG000000022256 | CXCL10      | 57.21871978 | 1.33E-150 |
| ENSRNOG000000029195 | Uba7        | 28.08079946 | 1.12E-143 |
| ENSRNOG000000018257 | HPX         | 106.9956782 | 1.94E-141 |
| ENSRNOG000000019648 | Col6a3      | 0.107641632 | 8.38E-138 |
| ENSRNOG000000009822 | TLR2        | 13.23376594 | 1.41E-135 |

**Supplemental Table 4: Top20 significant changed genes in RBFox1 expressed neonatal cardiomyocytes**  
List of top 20 significantly changed genes in Figure 1J

**Figure S1**

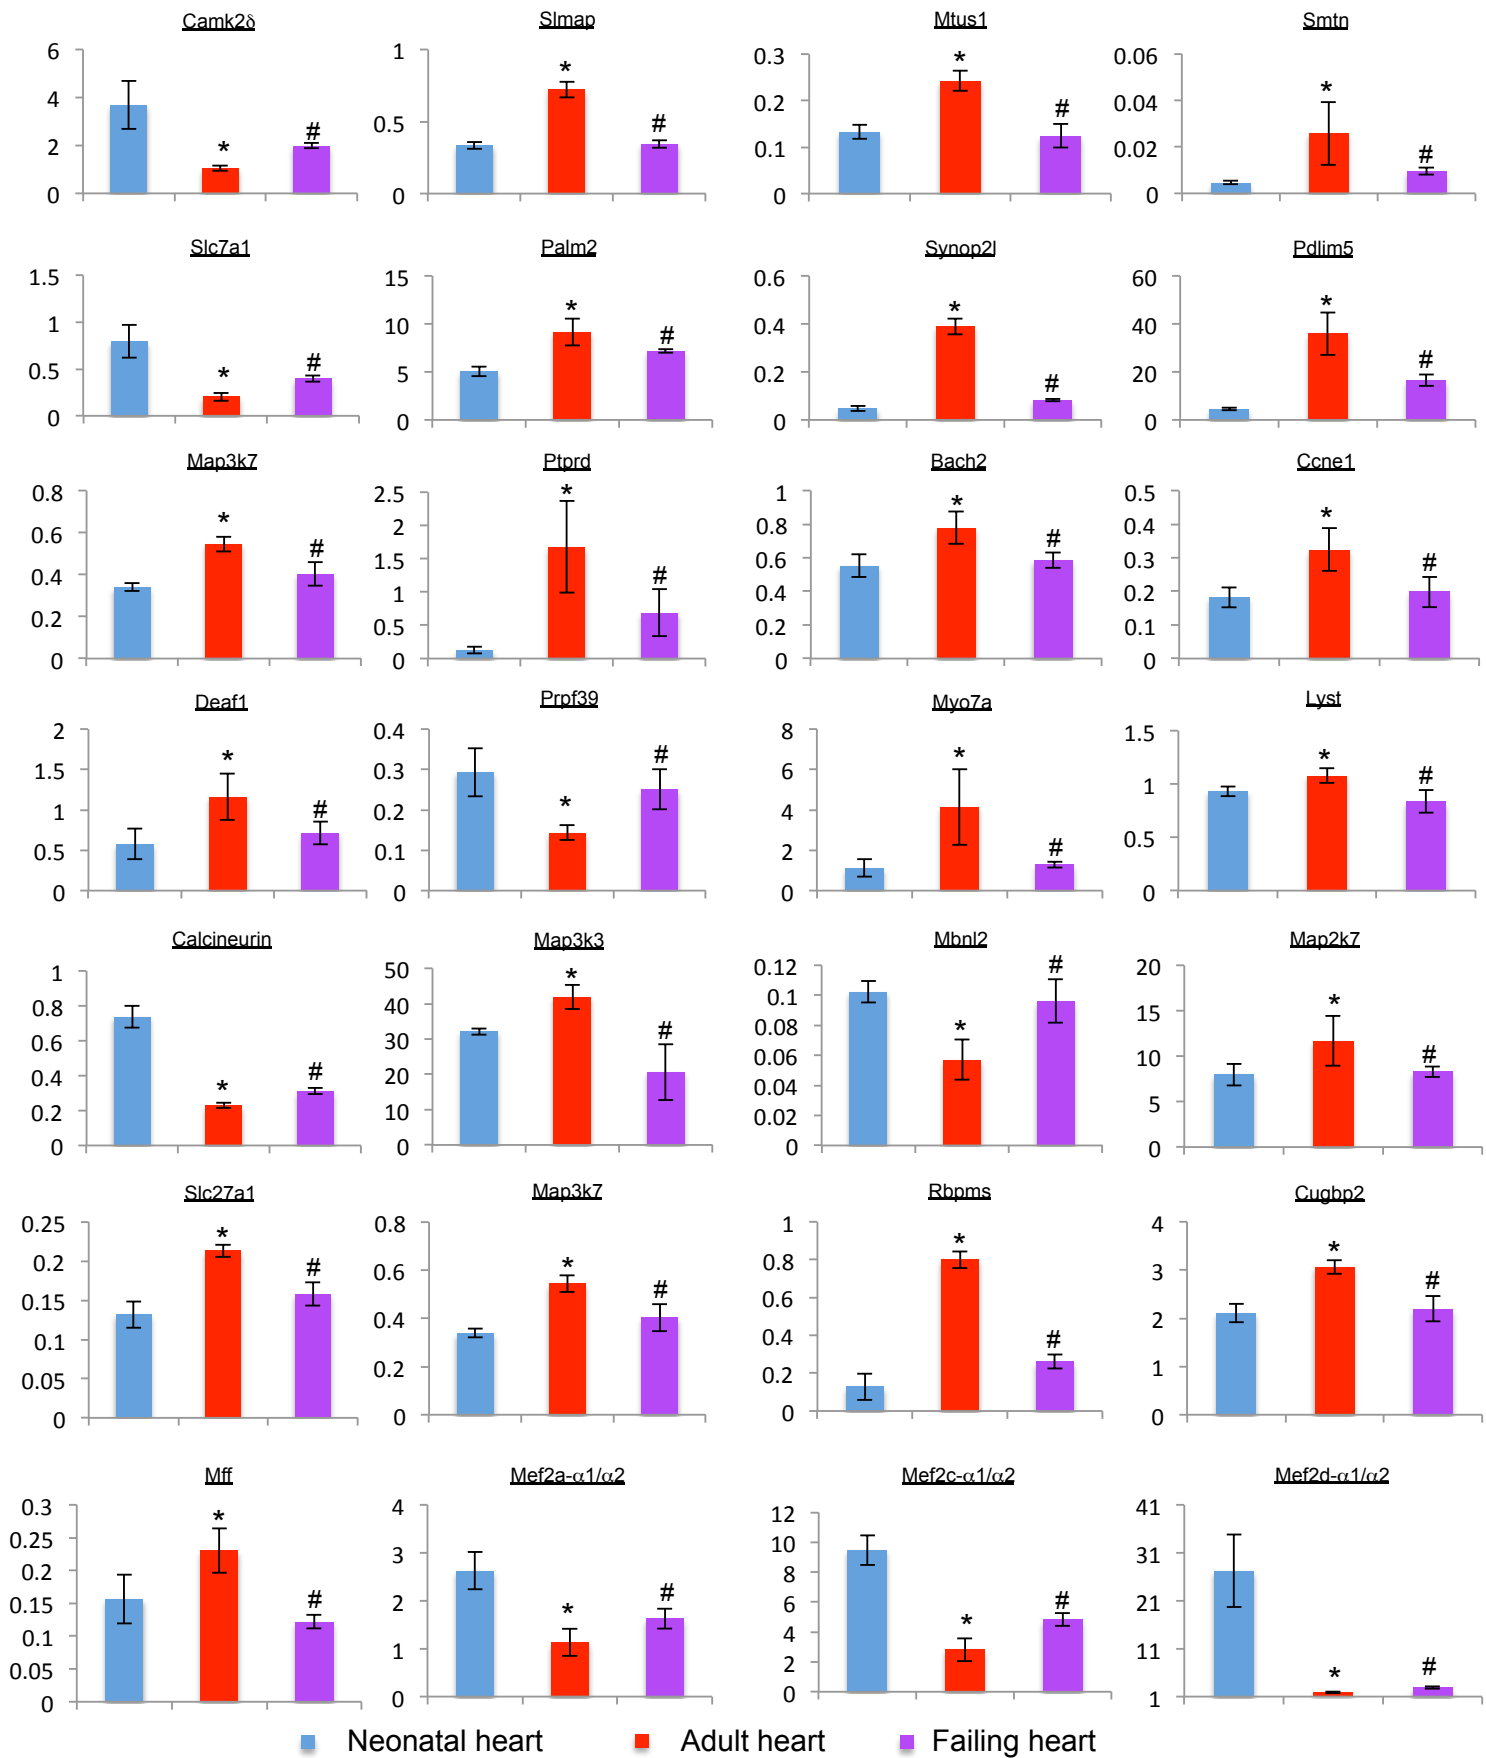

**Supplemental Figure S1: Relative expression levels of 32 splicing events were measured by real-time qPCR using exon specific primers in Sham and TAC induced failing mouse hearts.** The RNA samples were obtained from left ventricles of mouse P1 neonatal hearts (Neonatal), 5 month old normal adult hearts (Adult) and age-matched pressure-overload induced failing hearts (Failing Heart) as indicated. (n=3 for each group). \*,  $p<0.05$  between healthy adult and neonatal hearts, #,  $p<0.05$  between healthy adult and failing hearts. Significant differences between groups were determined by student t-test .

**Figure S2**

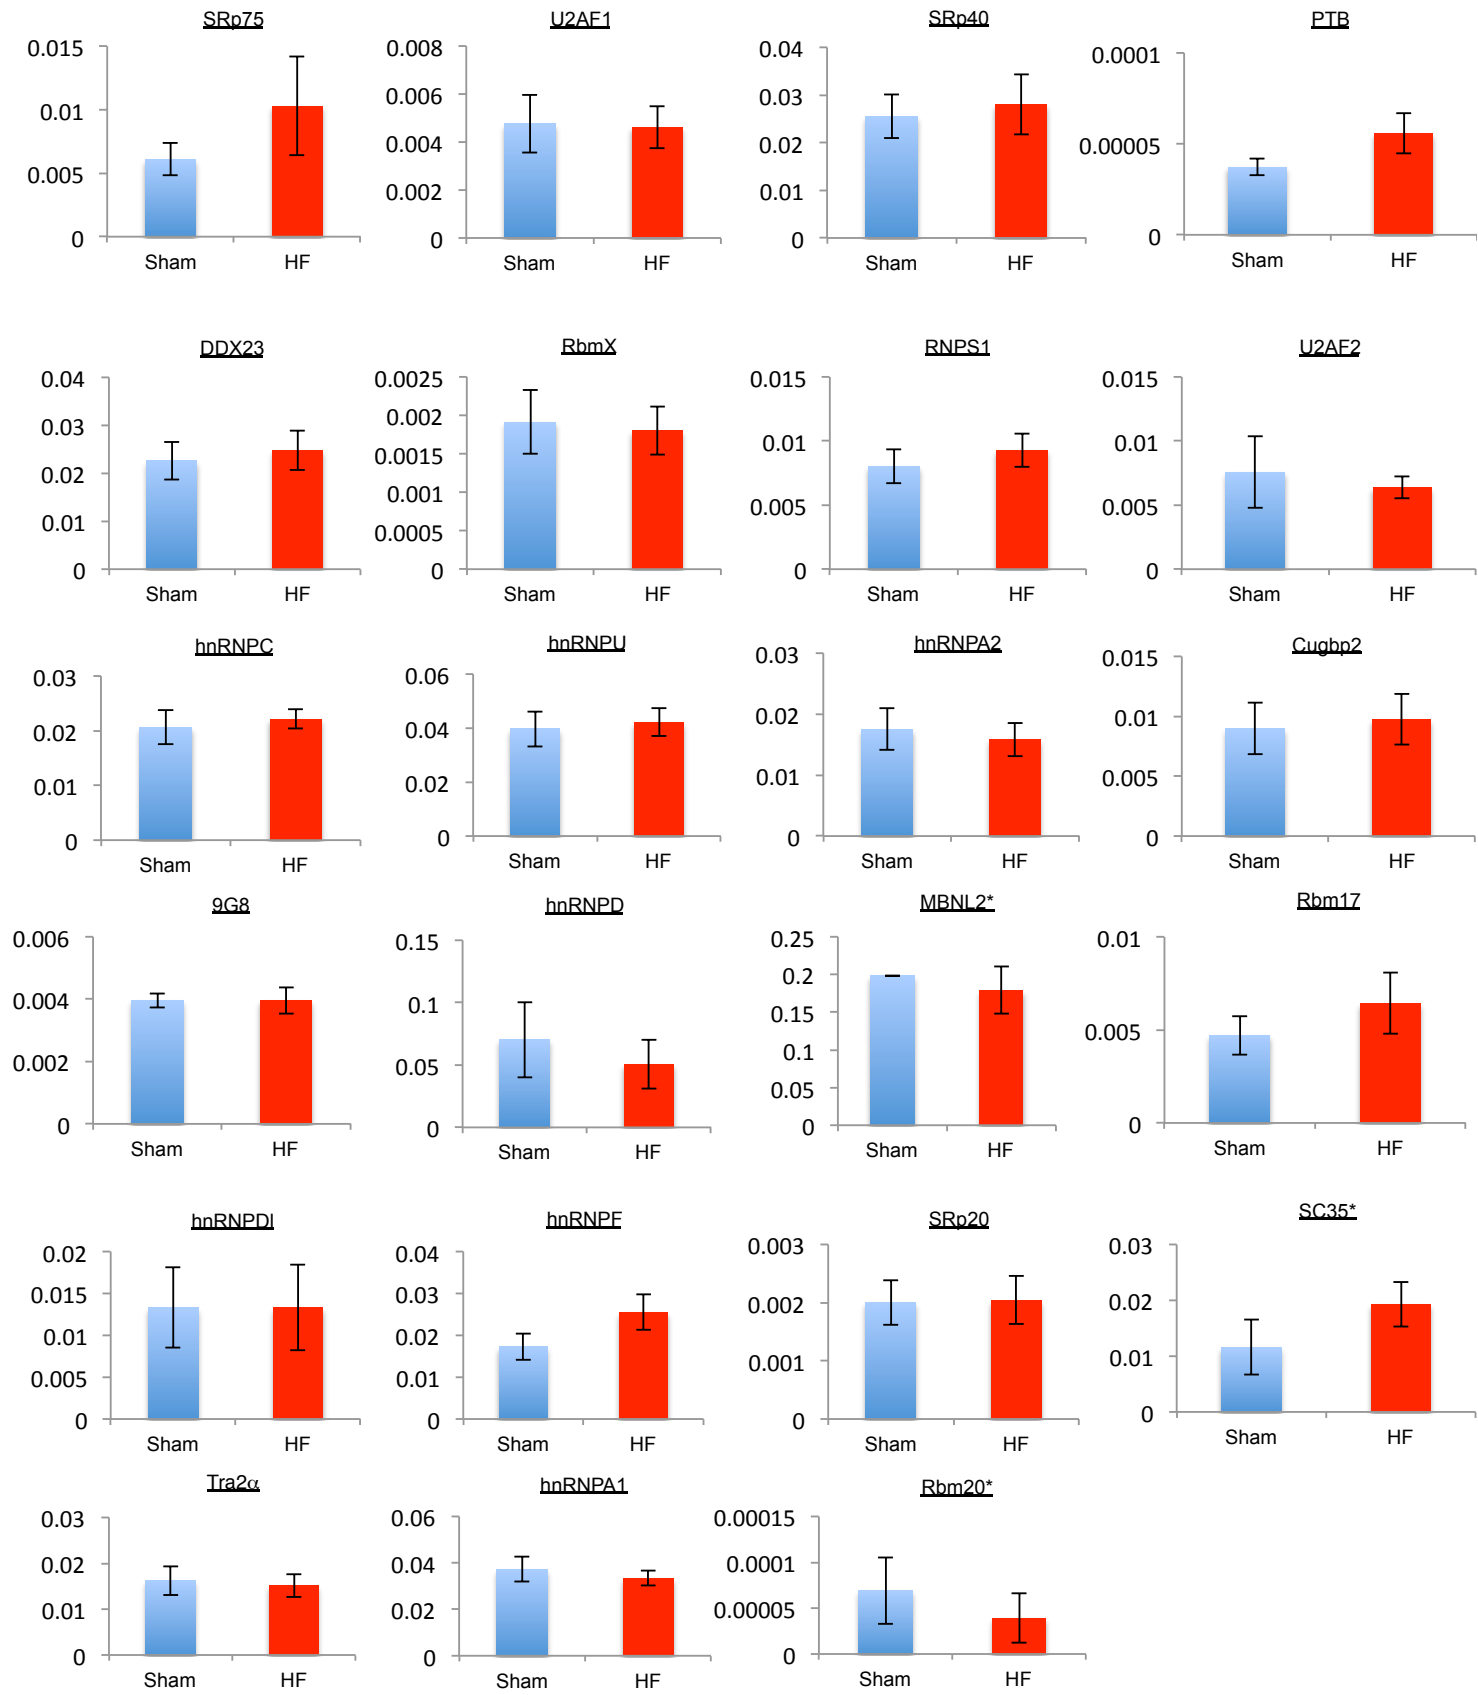

**Supplemental Figure S2: Expression profile of splicing regulators in pressure-overload induced failing hearts.** Known splicing regulators expression profile is determined using real-time PCR in adult 8 weeks post-TAC or Sham operated hearts. N=3 each sample. \* indicates the splicing regulators with known function in hearts. Significant differences between groups were determined by student t-test

Figure S3

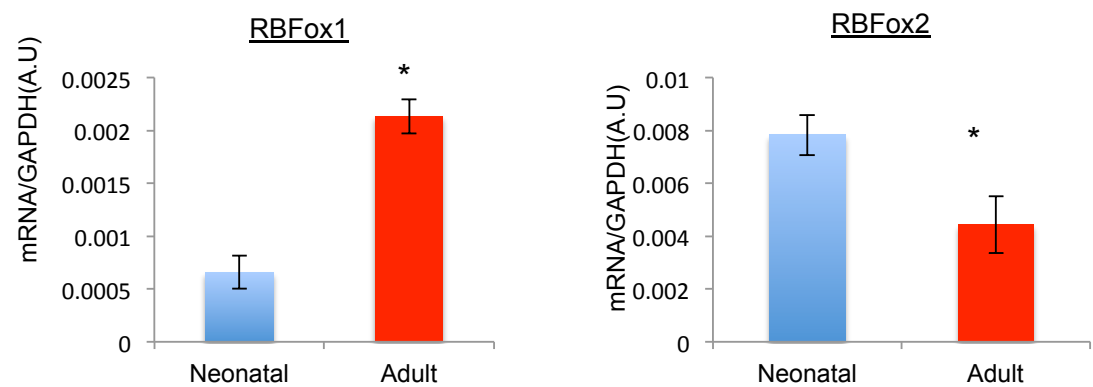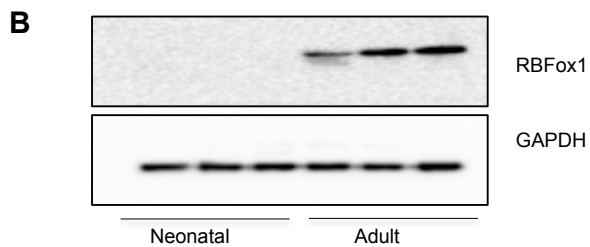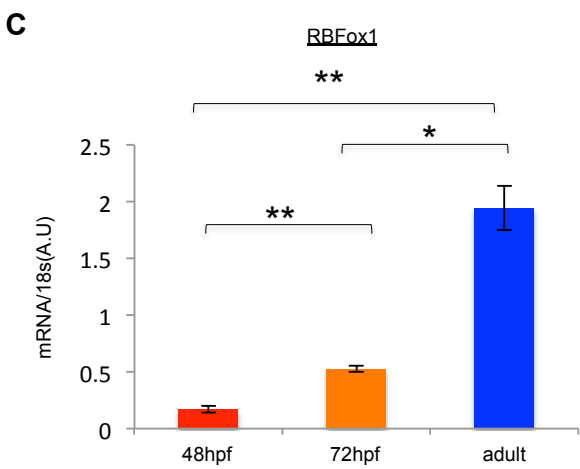

**Supplemental Figure S3: RBFox1 expression is significantly induced during cardiac development.** **A.** RBFox1 and RBFox2 expression was determined by real-time PCR in post-natal day 1 mouse hearts and compared with 2 month old adult mouse hearts. N=3 each sample, \*, $p<0.05$ . **B.** RBFox1 expression level is determined by Western Blot analysis in post-natal day 1 neonatal hearts comparing to 8 weeks old adult male mouse hearts. N=3 each sample. **C.** RBFox1 expression level is determined by real-time PCR during different zebrafish cardiac developmental stages. Zebrafish embryos hearts were isolated at indicated developmental stages and RNA was extracted from 30 pooled hearts as one sample. Significant differences between groups were determined by student t-test.

Figure S4

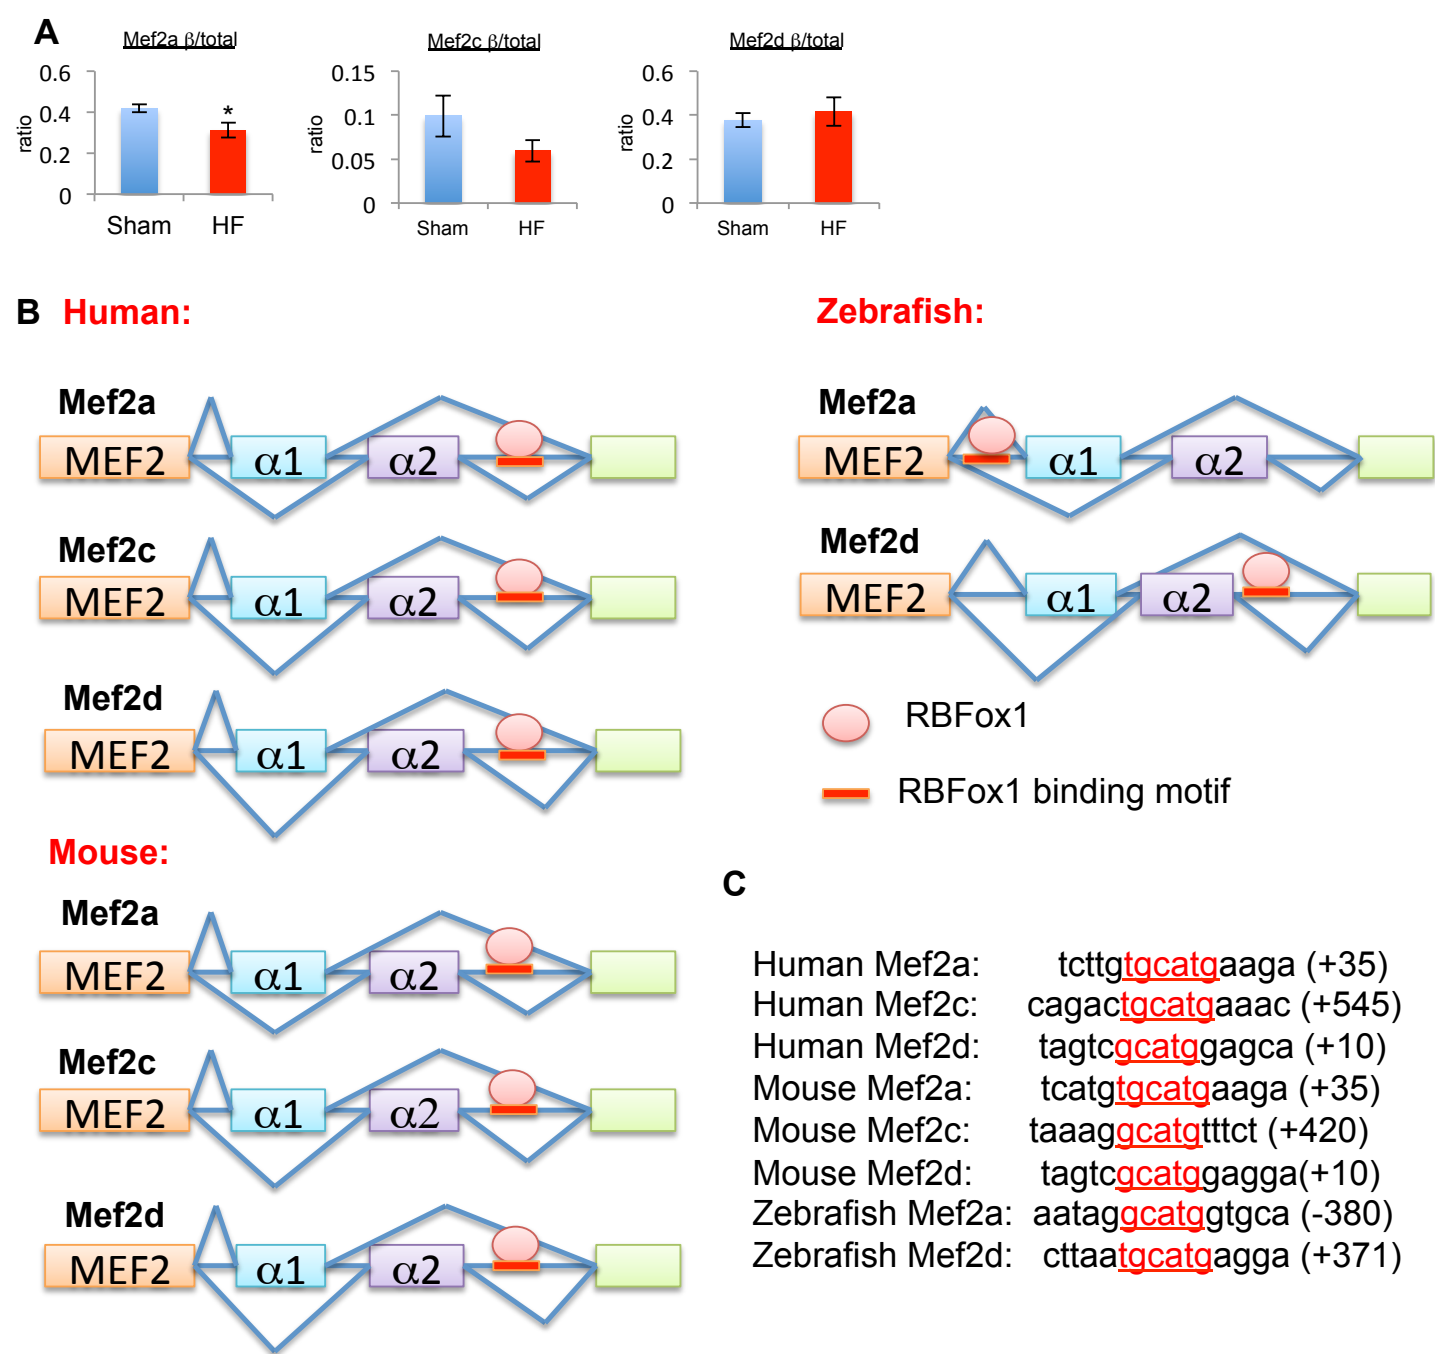

**Supplemental Figure S4: Alternative splicing profile of MEF2 hearts.** **A.** Mef2 family member b exon expression level was quantified by real-time PCR in Sham and failing mouse hearts. N=3 each sample. **B.** Schematic view for the MEF2 mutually exclusive spliced exon and conserved RBFox1 binding motif in MEF2 genes in human, mouse and zebrafish. **C.** Sequence containing RBFox1 binding motif in MEF2. Number represents location from  $\alpha 2$  exon. \*: Number in zebrafish Mef2a represents location from  $\alpha 1$  exon. Significant differences between groups were determined by student t-test (**A**).

Figure S5

A

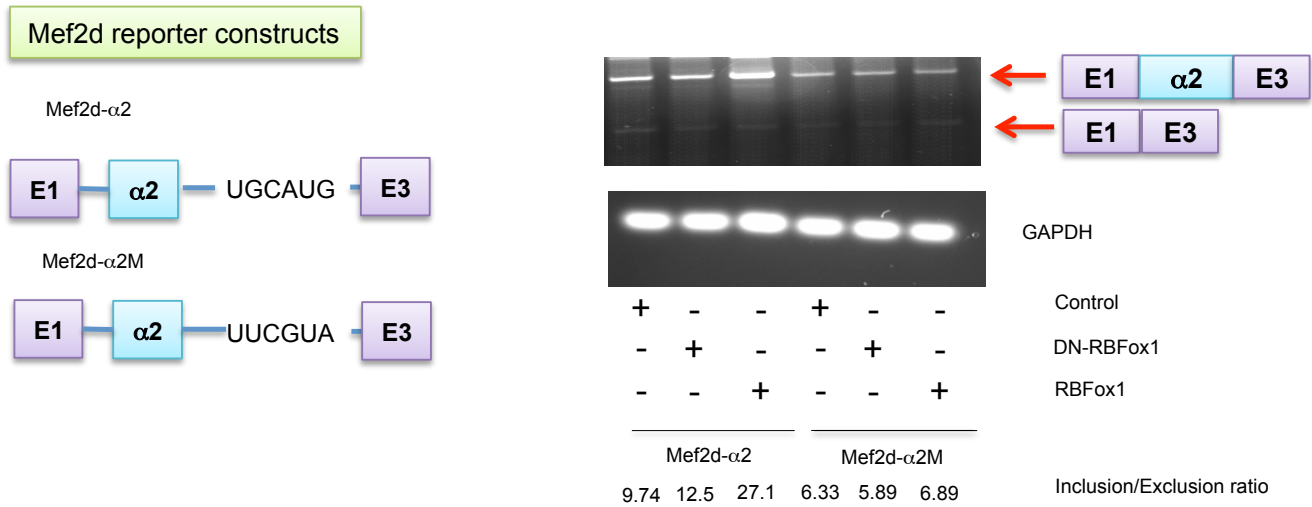

B

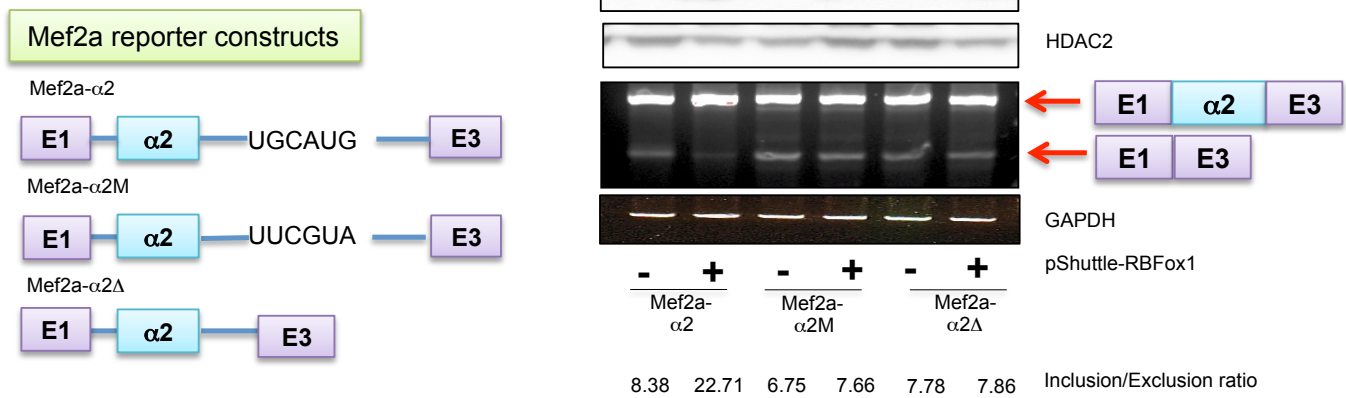

C

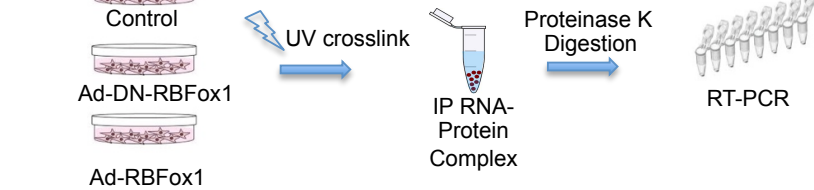

D

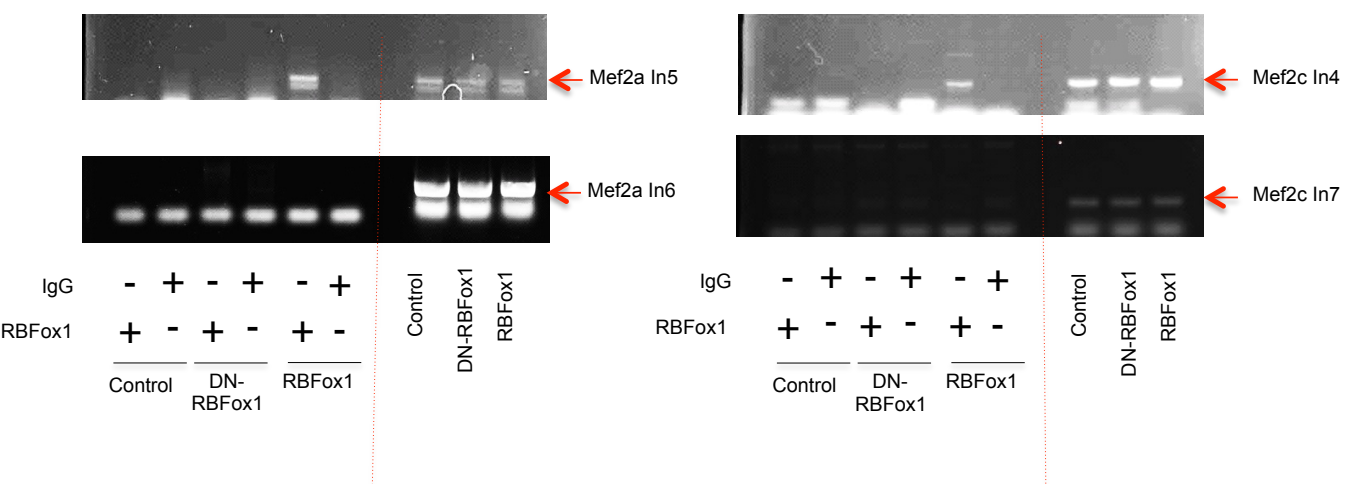

**Supplemental Figure S5: MEF2 is a direct downstream target of RBFox1 in NRVM.** **A.** Minigene reporter construct containing mouse Mef2d Exon  $\alpha 2$  and adjacent intron fragment indicated as in Figure 1 were used to transfected with NRVM with RBFox1 adenovirus co-injection. 48hr post injection, cells were collected and RNA was extracted for RT-PCR analysis. PCR product was separated on 4% agarose gel, inclusion/exclusion ratio was quantified and listed. **B.** Minigene reporter constructs containing mouse Mef2a Exon  $\alpha 2$  and adjacent intron fragment containing putative RBFox1 binding motif (UGCAUG), mutant RBFox1 binding motif (UUCGUA) are illustrated. Reporter construct was transfected into HEK293 cells alone or in combination with RBFox1 expression vector. 48hr post transfection, cells were harvested and semi-quantitative RT-PCR analysis was performed to determine the relative level of transcripts containing exon  $\alpha 2$  or excluded exon  $\alpha 2$ . Upper band represents  $\alpha 2$  inclusion splicing variant. Lower band represents  $\alpha 2$  exclusion splicing variant. GAPDH was used as internal control. Products were visualized on 4% agarose gel and further quantified based on intensity. RBFox1 expression level is confirmed by Western Blot. Number represents Exon  $\alpha 2$  inclusion/exclusion ratio. **C.** Schematic view of the CLIP analysis in C2C12 cells. **D.** C2C12 cells were infected with DN-RBFox1 or RBFox1 adenovirus and compared with mock-infected cells. 48hr post infection, cells were UV cross-linked followed by indicated antibody. Primers were designed at indicated intron region in Mef2a and Mef2c and RT-PCR was performed to confirm the interaction.

Figure S6

A

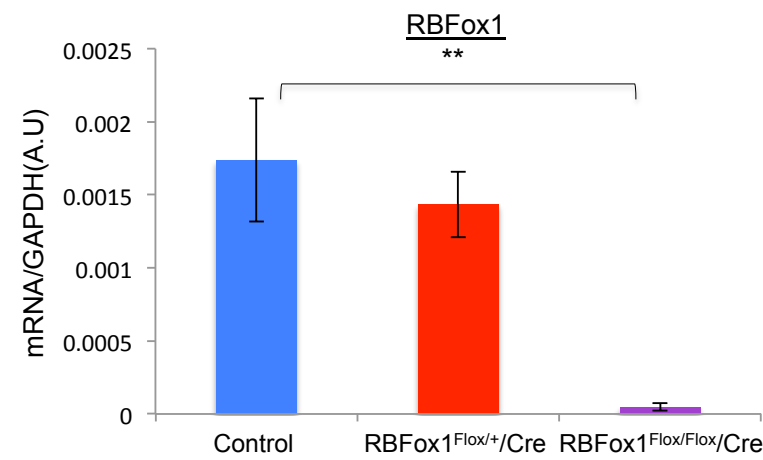

B

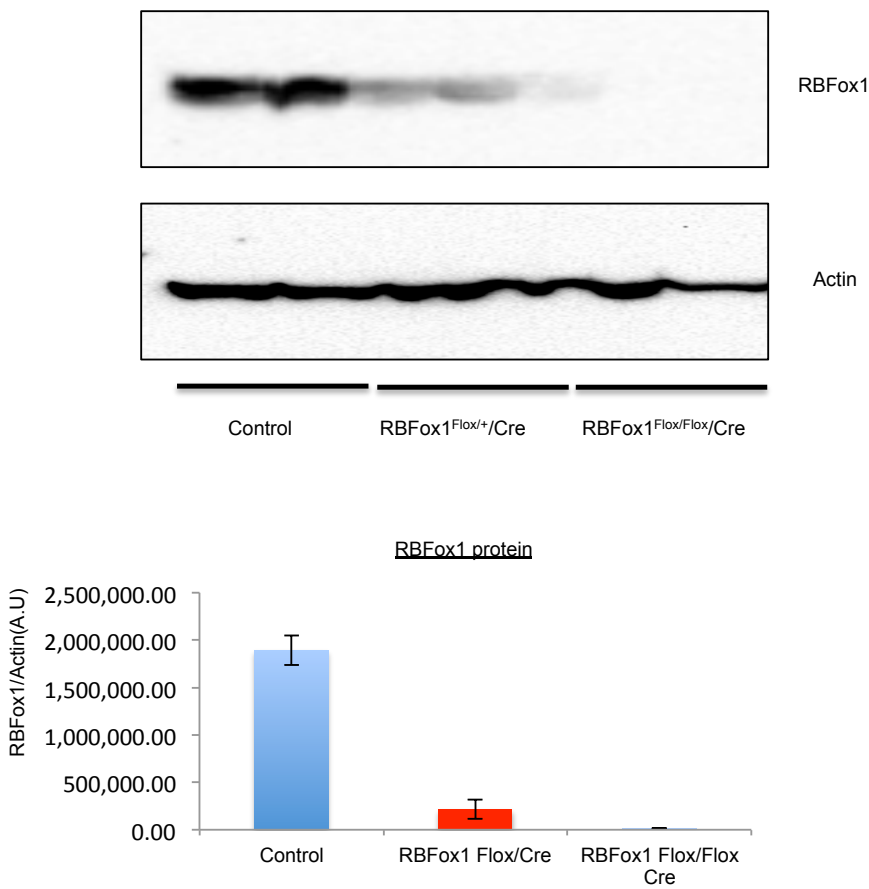

**Supplemental Figure S6: RBFox1 is efficiently inactivated in RBFox1-cKO mice. A.** Real-time PCR quantification of RBFox1 expression level in Control; RBFox1<sup>Flox/+</sup>/Cre and RBFox1<sup>Flox/Flox</sup>/Cre mice hearts. n=3 each sample, \*, $p<0.05$  **B.** Upper: Western blot analysis of RBFox1 protein expression in Control; RBFox1<sup>Flox/+</sup>/Cre and RBFox1<sup>Flox/Flox</sup>/Cre mice hearts. n=2 each sample. Lower: Quantification of RBFox1 expression level based on Western shown in upper panel. Significant differences between groups were determined by student t-test (**A**).

Figure S7

A

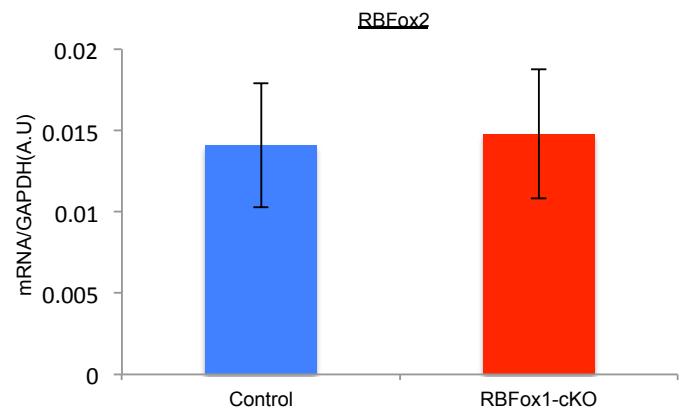

B

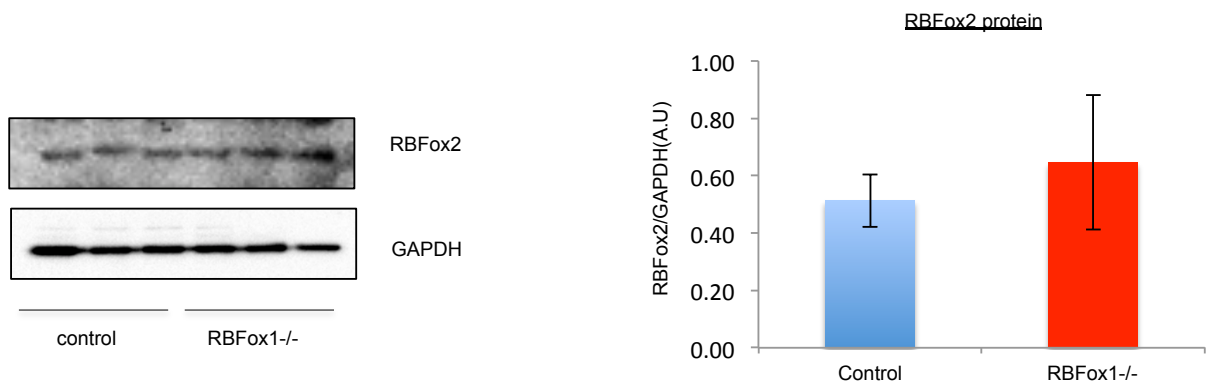

**Supplemental Figure S7: RBFox2 expression is unaffected in RBFox1-cKO mouse hearts.** A. Real-time qPCR quantification of RBFox2 expression level in Control; RBFox1<sup>Flox/+</sup>/Cre and RBFox1<sup>Flox/Flox</sup>/Cre mice hearts. **B.** Left: Western blot analysis of RBFox2 expression in control and RBFox1-CKO mouse hearts. GAPDH was used as loading control. N=3 each sample. Right: Quantification of RBFox2 protein expression level based on Western Blot shown on the left.

Figure S8

A

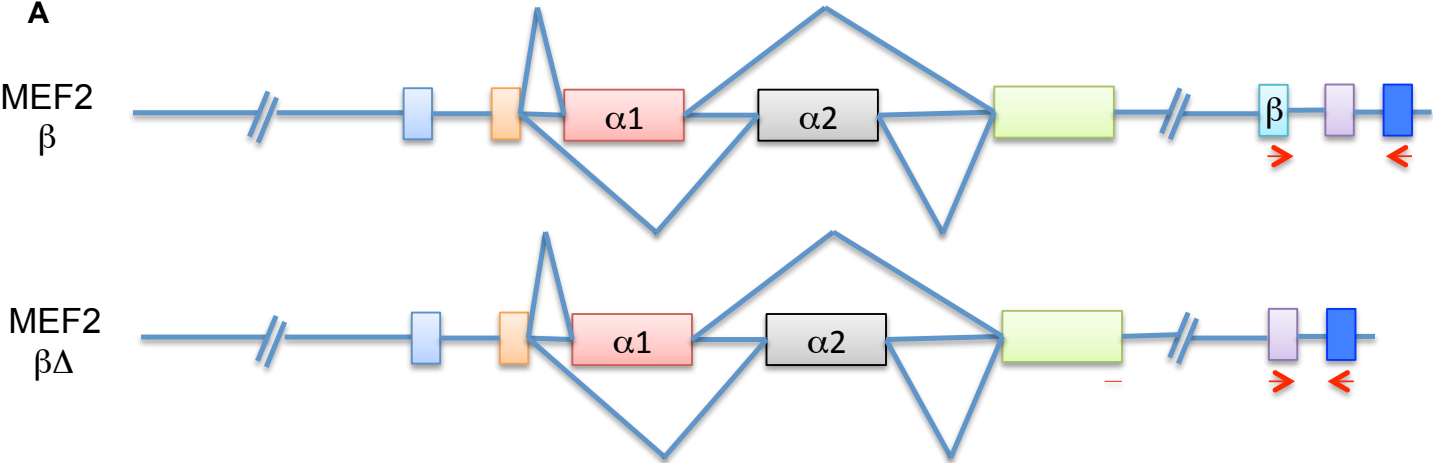

B

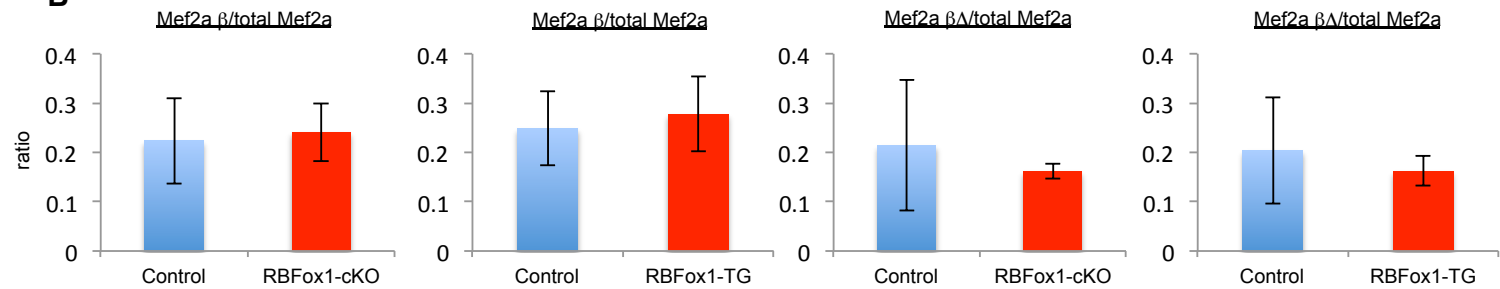

C

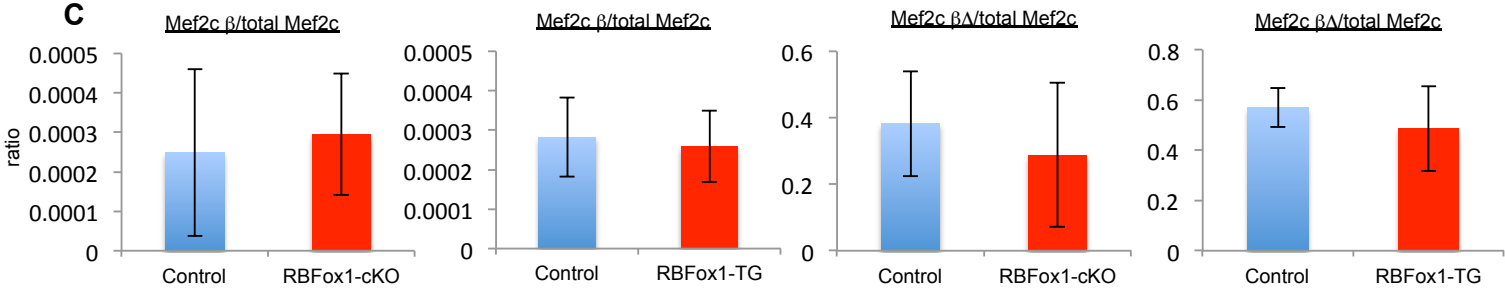

D

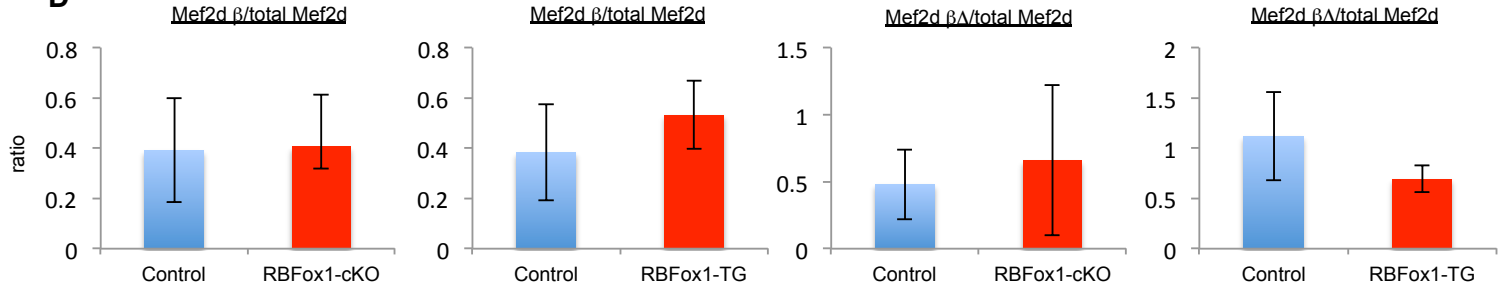

**Supplemental Figure S8: MEF2  $\beta$  exon is not directly regulated by RBFOX1.** **A.** Schematic view of MEF2 gene with  $\beta$  exon indicated. Arrow represented primers used for real-time qPCR quantification. **B.** Real-time PCR analysis of ratio for Mef2a  $\beta$ /total Mef2a; Mef2a  $\beta\Delta$ /total Mef2a in Control, RBFOX1-cKO and RBFOX1-TG mouse hearts. n=3 each sample. **C.** Real-time PCR analysis of ratio for Mef2c  $\beta$ /total Mef2c; Mef2c  $\beta\Delta$ /total Mef2c in Control, RBFOX1-cKO and RBFOX1-TG mouse hearts. n=3 each sample. **D.** Real-time PCR analysis of ratio for Mef2d  $\beta$ /total Mef2d; Mef2d  $\beta\Delta$ /total Mef2d in Control, RBFOX1-cKO and RBFOX1-TG mouse hearts. n=3 each sample.

Figure S9

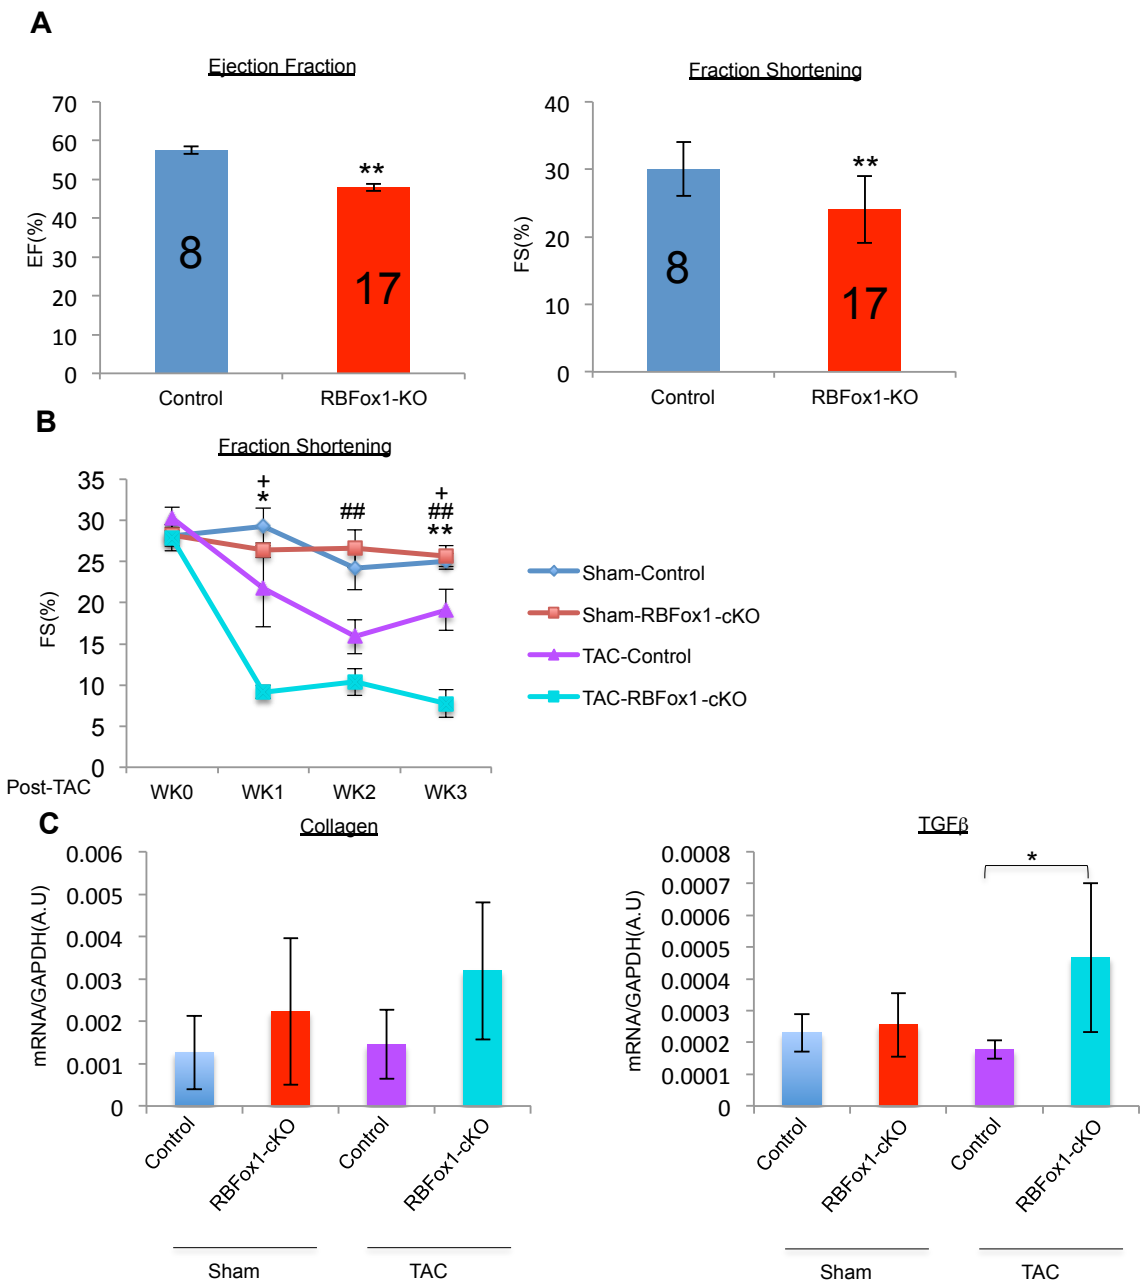

**Supplemental Figure S9: RBFox1 is an important splicing regulator mediating mouse cardiac function.**

**A.** RBFox1-CKO mice were compared with control mice. Echocardiography was used to determine cardiac Ejection fraction and Fraction shortening. Control n=8, RBFox1 n=17 ( indicated in the bar) **B.** Weekly follow up of fraction shortening for TAC operated control and RBFox1-cKO mice, compared with sham operated littermates. Sham-Control (n=6), Sham-RBFox1-cKO (n=6), TAC-Control (n=6), TAC-RBFox1-cKO (n=8) . +,  $p < 0.01$  between sham-control and TAC-control; ##,  $p < 0.01$  between sham-RBFox1-cKO and TAC-RBFox1-cKO; \*,  $p < 0.05$  between TAC-control and TAC-RBFox1-cKO; \*\*,  $p < 0.01$  between TAC-control and TAC-RBFox1 **C.** Real-time qPCR analysis of Collagen III and TGF $\beta$  expression level in TAC operated control and RBFox1-cKO mice hearts, compared with sham operated littermates. n=4 each sample, \*,  $p < 0.05$ . Significant differences between groups were determined by student t-test (**A**) or Multi-way Anova (**B-C**).

Figure S10

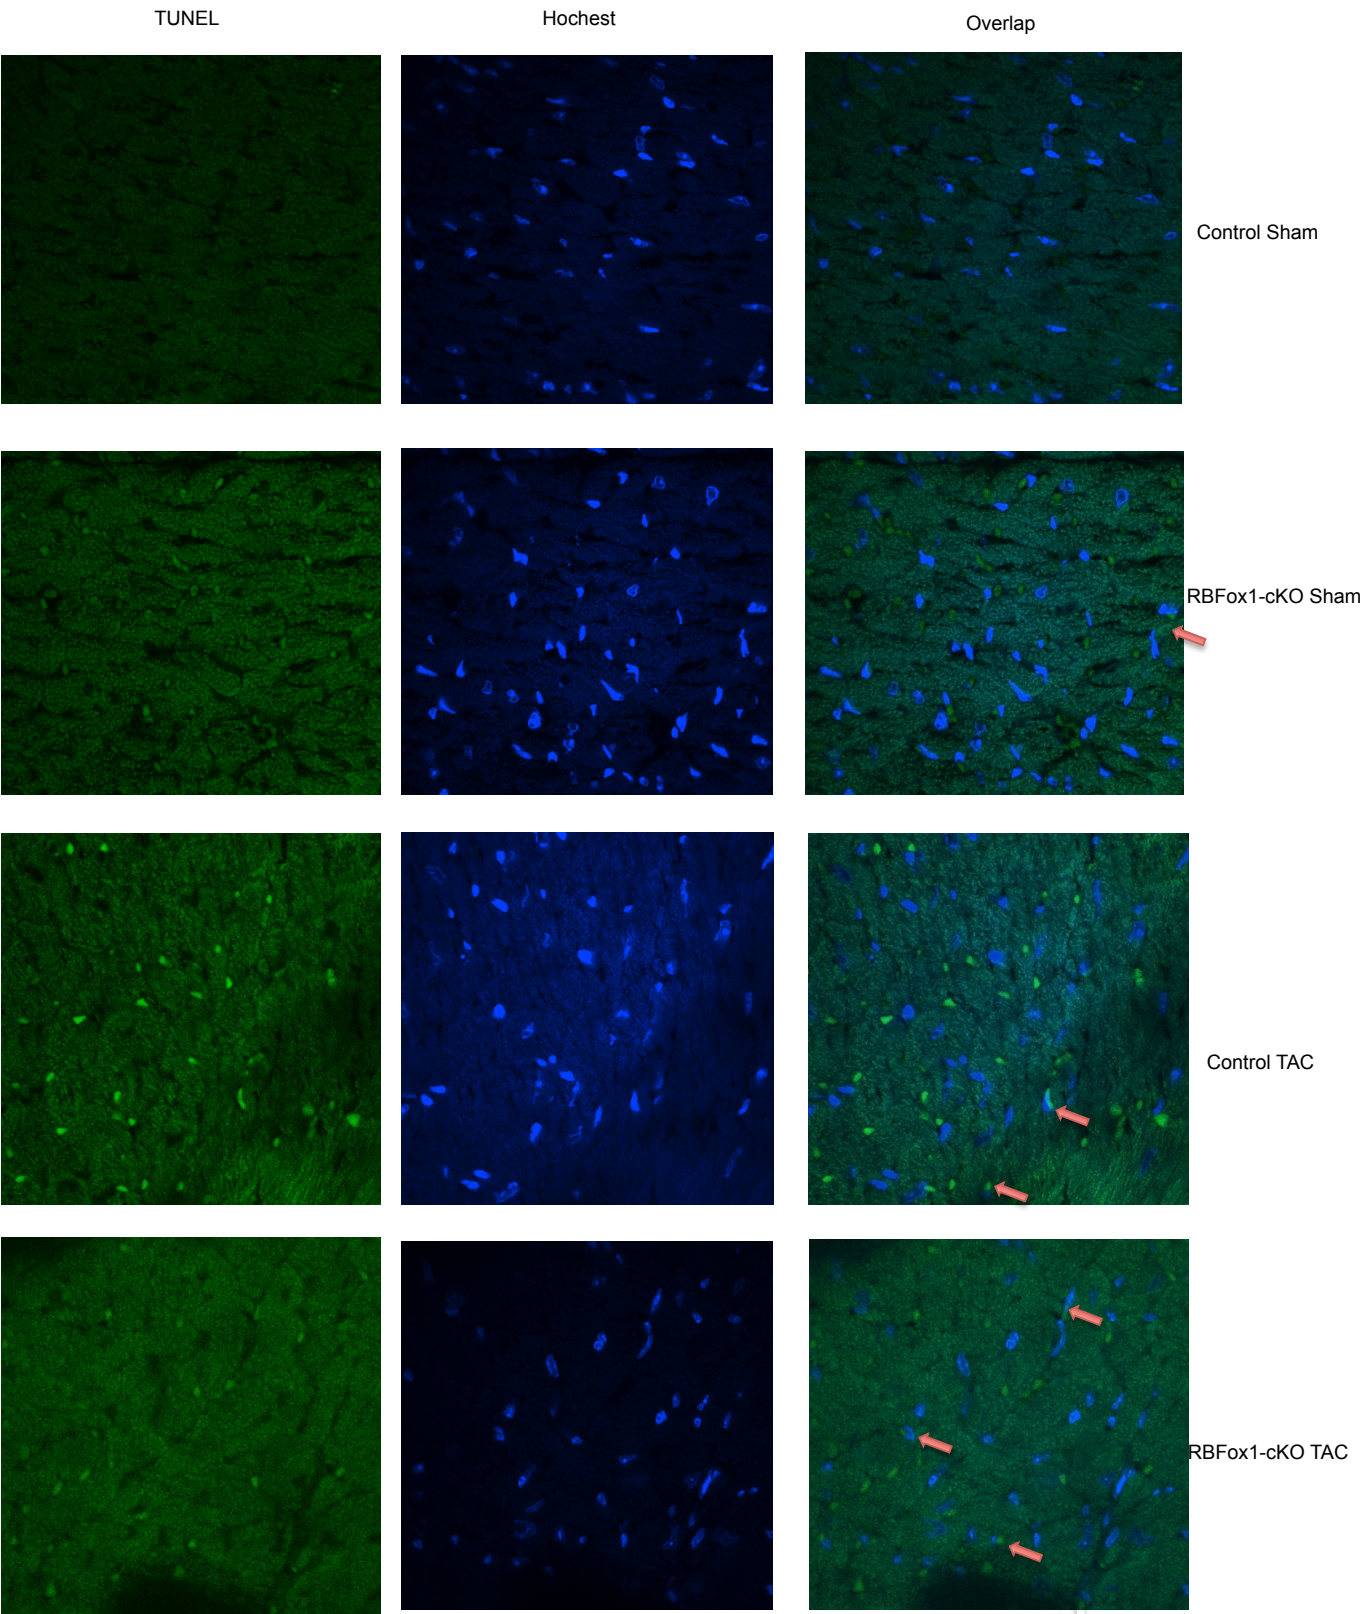

**Supplemental Figure S10: Inactivation of RBFox1 potentially caused loss of cardiomyocytes during pressure overload stress.** TUNEL staining image of control and RBFox1-cKO mice 3 weeks post TAC compared to sham operated controls. Magnification: 60× . Data are representative of at least 3 independent experiments.

Figure S11

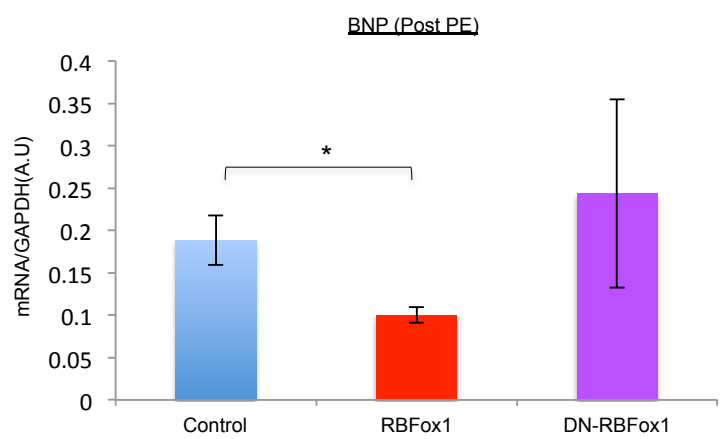

**Supplemental Figure S11: RBFox1 splicing regulator activity is important for cardiomyocytes hypertrophy response.** Real-time qPCR analysis of BNP expression level in mock infected, RBFox1 or dominant negative RBFox1 (DN-RBFox1) adenovirus infected NRVM post 48hr PE treatment.. n=3 each group, \*, $p<0.05$ . Significant differences between groups were determined by student t-test.

Figure S12

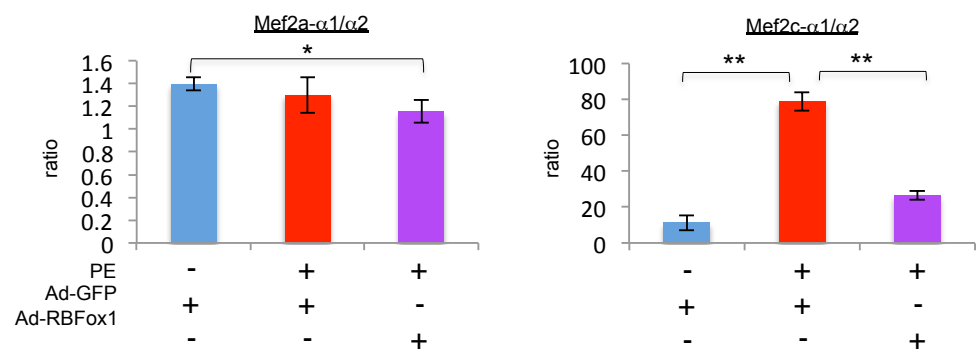

**Supplemental Figure S12: Alternative splicing profile of MEF2 is altered upon PE treatment in NRVM.** Real-time PCR quantification of Mef2a  $\alpha 1/\alpha 2$  ratio and Mef2c  $\alpha 1/\alpha 2$  ratio in control, 48hr PE treated alone or in combination with RBFox1 adenovirus infected cardiomyocytes. n=3 each sample, \*, $p<0.05$ . Significant differences between groups were determined by student t-test.

Figure S13

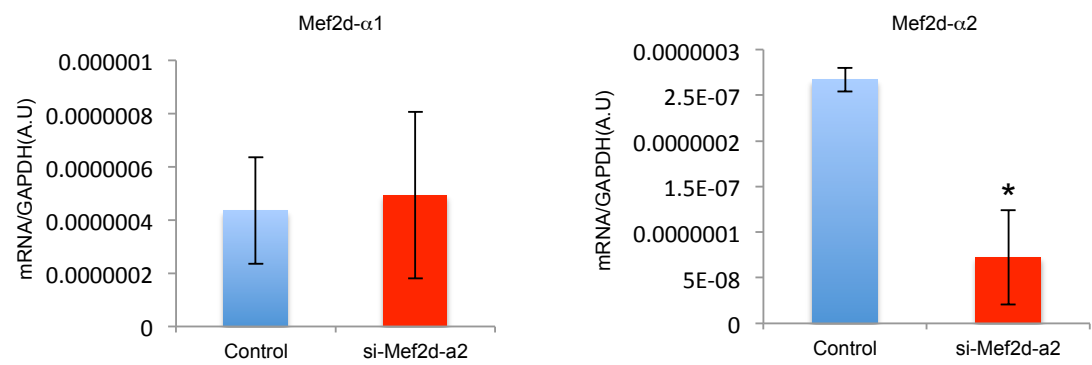

**Supplemental Figure S13: Specificity of the siRNA.** NRVM was transfected with control or si-Mef2d- $\alpha$ 2 for 48hr. Cells were harvested and real-time PCR was performed to determine the expression level of Mef2d- $\alpha$ 1 and Mef2d- $\alpha$ 2 isoform expression. N=3 each sample. Significant differences between groups were determined by student t-test .

Figure S14

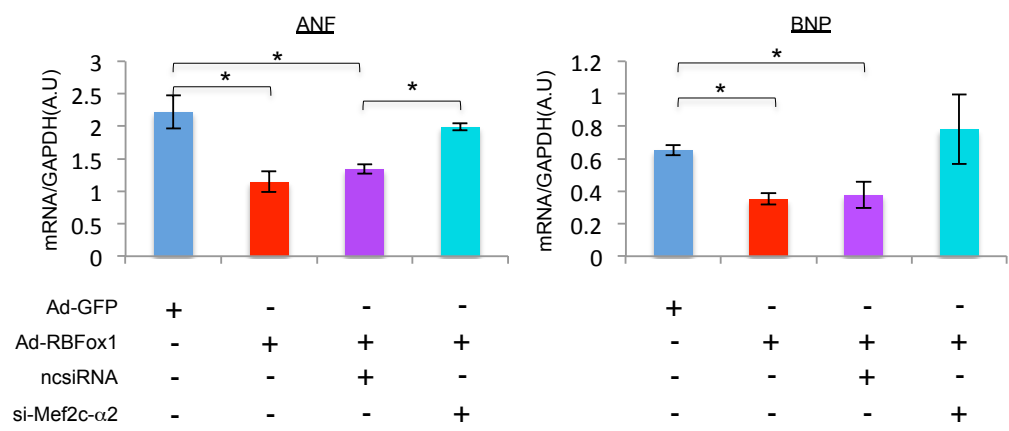

**Supplemental Figure S14: Regulatory role of Mef2c  $\alpha$ 2 transcript in cardiomyocytes hypertrophy.** Hypertrophy marker gene expression level in control, PE treated; PE treated with RBFox1 adenovirus infection, PE +RBFox1 adenovirus +nc-siRNA; PE+RBFox1 adenovirus+si-Mef2c- $\alpha$ 2. Real-time qPCR is used to determine expression level of ANF and BNP. n=3 each sample. \*, $p<0.05$ . Significant differences between groups were determined by student t-test.

Figure S15

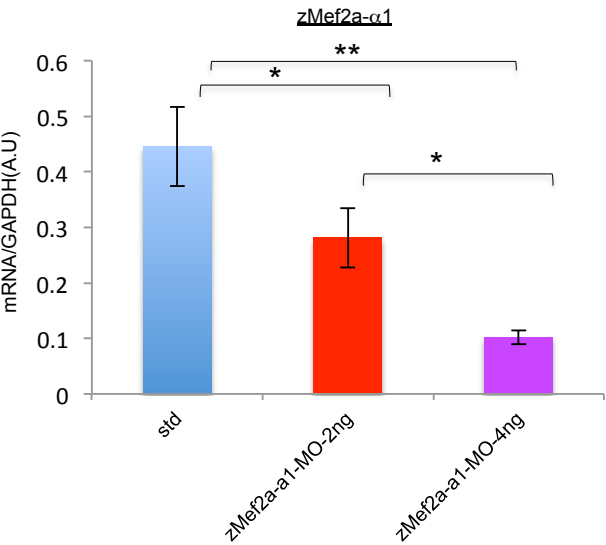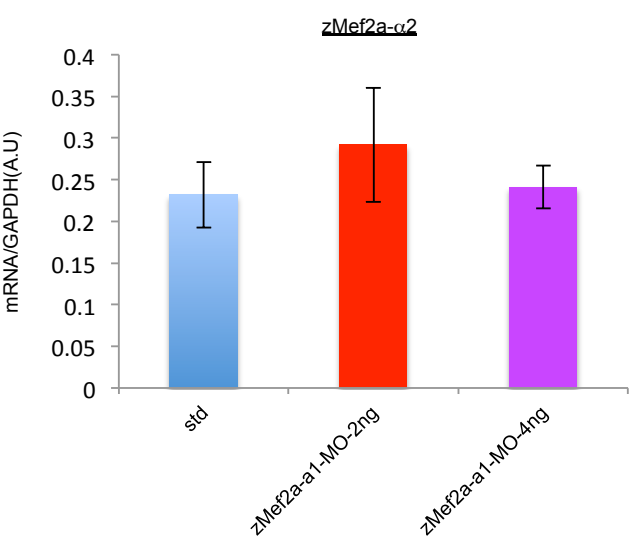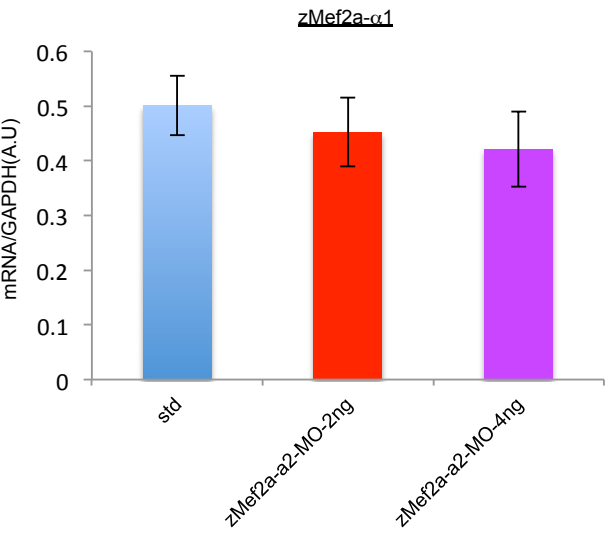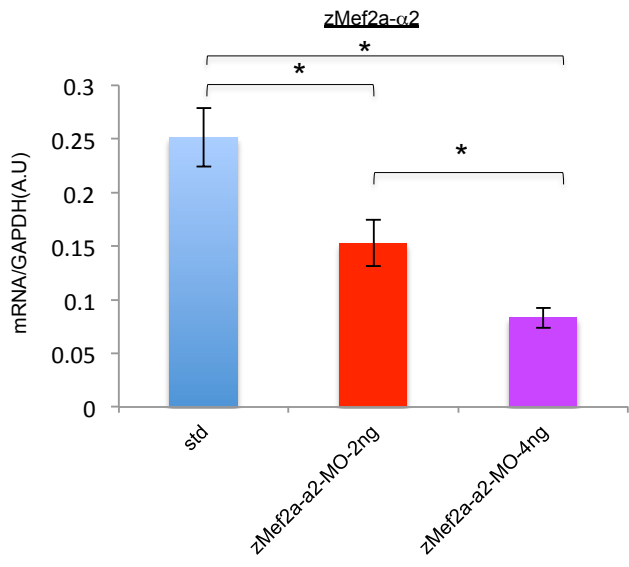

**Supplemental Figure S15: Specificity of the morpholino.** zMef2a- $\alpha$ 1 or zMef2a- $\alpha$ 2 mRNA expression level quantified by real-time PCR upon zMef2a- $\alpha$ 1/zMef2a- $\alpha$ 2 MO injection. N=30 each, \*, $p < 0.05$ . Significant differences between groups were determined by student t-test .

Figure S16

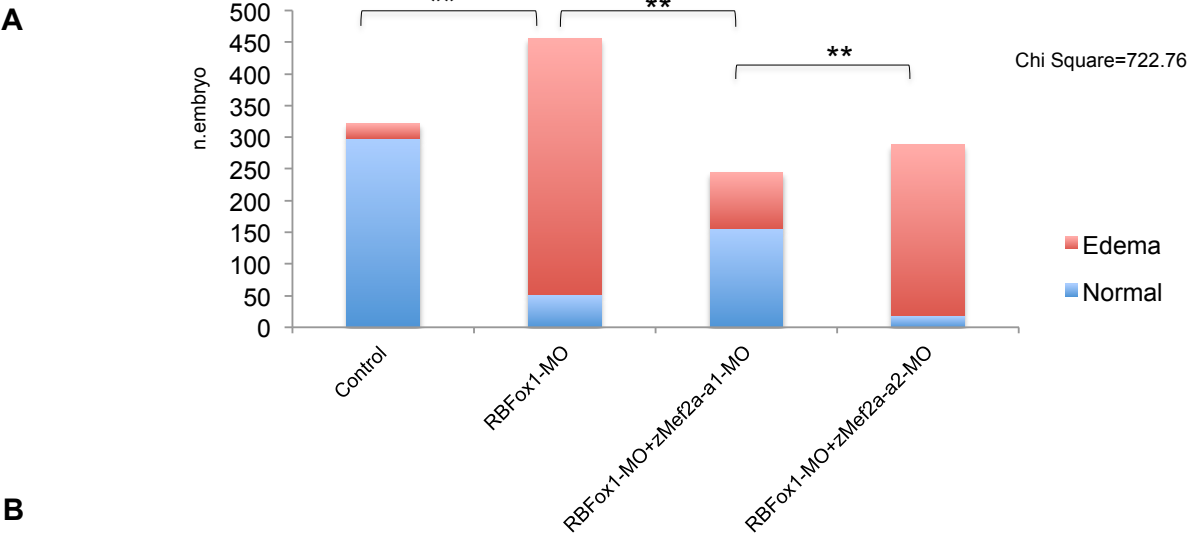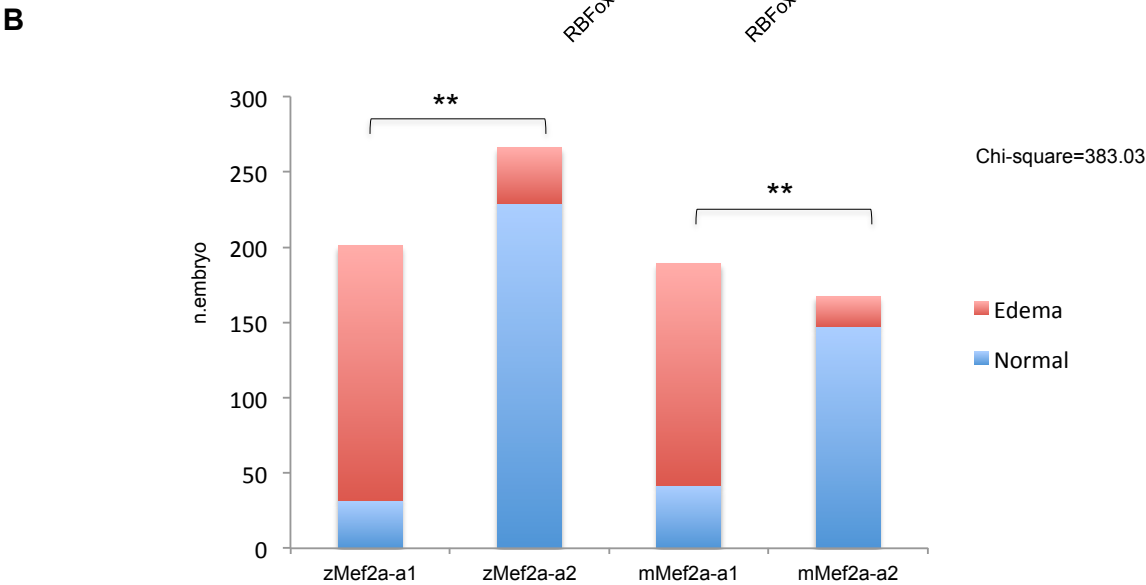

**Supplemental Figure S16: Summary of zebrafish phenotypes of the different morphants.** Significant differences between groups were determined by Fisher Exact.

Figure S17

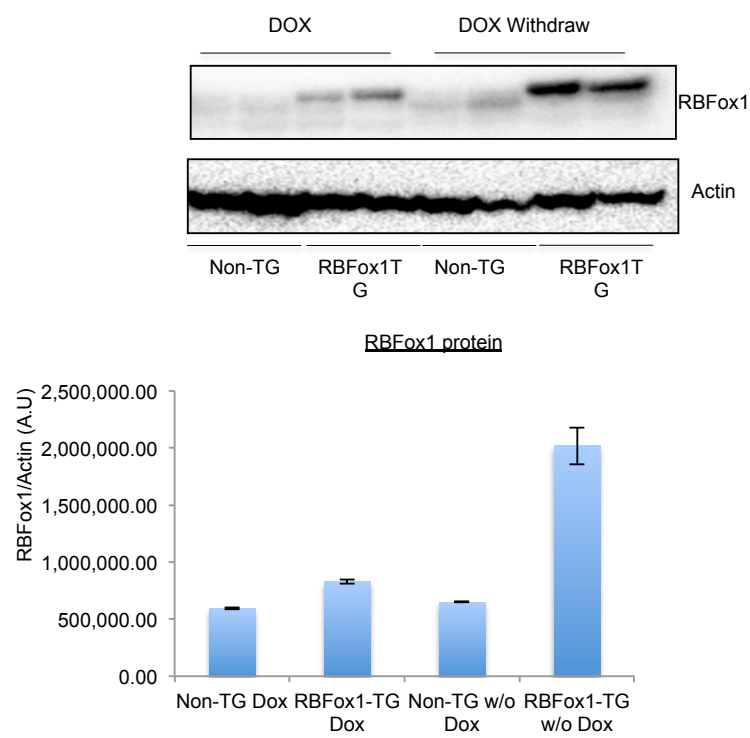

**Supplemental Figure S17: RBFox1 expression level is tightly regulated by doxycycline in RBFox1-TG mouse hearts.** Upper: Western blot analysis of RBFox1 expression level in mouse fed with Doxycycline containing or regular chow diet in Non-TG and RBFox1-TG mice. Lower: Quantification of RBFox1 protein expression according to Western blot shown in the upper panel.

Figure S18

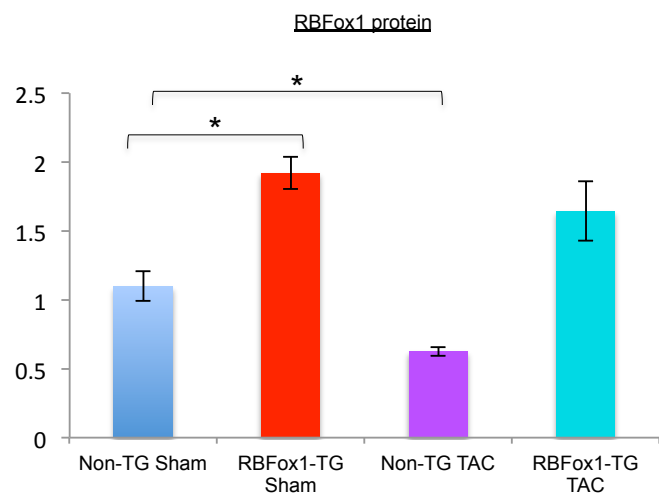

**Supplemental Figure S18: Quantification of RBFox1 protein expression based on Western Blot shown in Figure 4A. n=3 each sample, \*,  $p<0.05$ .** Significant differences between groups were determined by Multi-way Anova.

Figure S19

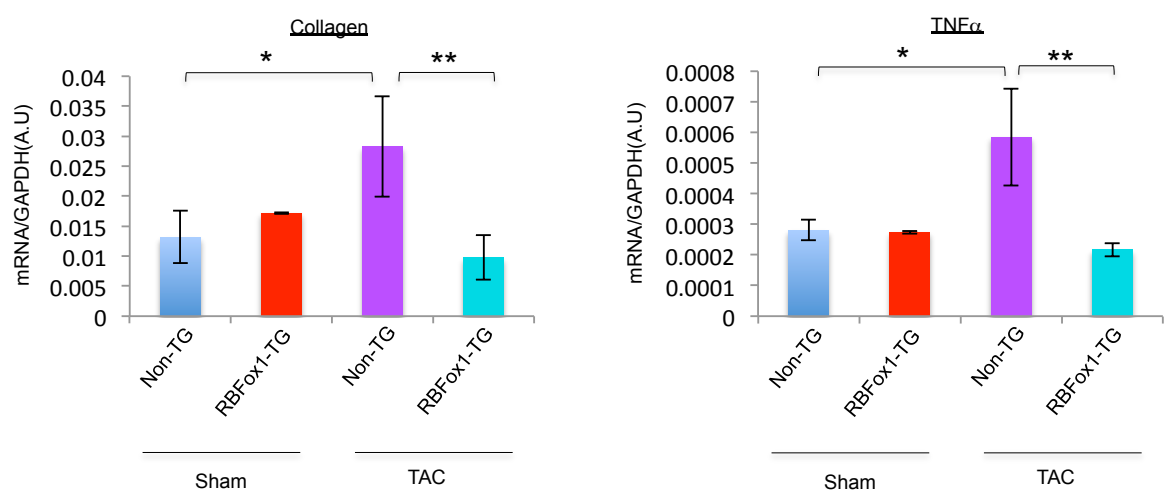

**Supplemental Figure S19: Restoring RBFox1 expression is sufficient to reduce inflammatory response in intact heart post TAC.** Real-time qPCR analysis of Collagen III and TNFa expression level in TAC operated non-TG and RBFox1-TG mouse hearts compared with sham operated littermates. n=4 each sample, \*, $p<0.05$ . Significant differences between groups were determined by Multi-way Anova.

Figure S20

Total number of samples used in Rasi-Seq in each group

| Surgery Group   | Number of Samples |
|-----------------|-------------------|
| WT-Sham         | 5                 |
| WT-TAC          | 7                 |
| RBFox1-TG-Sham  | 4                 |
| RBFox1-TG-TAC   | 3                 |
| RBFox1-CKO-Sham | 3                 |
| RBFox1-CKO-TAC  | 3                 |

Total n=25

**Supplemental Figure S20: RBFox1 mediate global alternative splicing defects in pathologically stressed heart.** Number of samples sequenced for Rasi-seq and corresponding treatment.
